1 **A Minimal Biophysical Model of Neocortical Pyramidal Cells:**  
2 **Implications for Frontal Cortex Microcircuitry and Field Potential**  
3 **Generation**

4 Beatriz Herrera<sup>1</sup>, Amirsaman Sajad<sup>2</sup>, Geoffrey F. Woodman<sup>2</sup>, Jeffrey D. Schall<sup>2</sup>, Jorge J.  
5 Riera<sup>1\*</sup>

6 <sup>1</sup>Department of Biomedical Engineering, Florida International University, Miami, Florida  
7 33174, USA; <sup>2</sup>Department of Psychology, Vanderbilt Vision Research Center, Center for  
8 Integrative & Cognitive Neuroscience, Vanderbilt University, Nashville, Tennessee 37203, USA

9 \*Corresponding author

10 E-mail: [jrieradi@fiu.edu](mailto:jrieradi@fiu.edu) (JR)

11 Number of pages: 38

12 Number of figures: 6

13 Number of tables: 3

14 Number of words for abstract, introduction, and discussion: 234, 641, and 1444.

15 Conflicts of interest: None

16 Acknowledgments

17 This work was supported by FIU SEED – grant Wallace Coulter Foundation (BH, JR),  
18 R01-EY019882 (JDS, GFW, BH, JR), and by Robin and Richard Patton through the E. Bronson  
19 Ingram Chair in Neuroscience (JDS). The authors thank Michelle Schall and Arash Moshkforoush  
20 for helpful discussions and comments on the manuscript.

## 21 **Abstract**

22  $\text{Ca}^{2+}$  spikes initiated in the apical dendrites of layer-5 pyramidal cells (PC) underlie  
23 nonlinear dynamic changes in the gain of cellular response, which is critical for top-down cognitive  
24 control. Detailed models with several compartments and dozens of ionic channels have been  
25 proposed to account for this  $\text{Ca}^{2+}$  spike-dependent gain with its associated critical frequency.  
26 However, current models do not account for all known  $\text{Ca}^{2+}$ -dependent features. Previous attempts  
27 to include more features have required increasing complexity, limiting their interpretability and  
28 utility for studying large population dynamics. We present a minimal 2-compartment biophysical  
29 model, overcoming these limitations. In our model, a basal-dendritic/somatic compartment  
30 included typical  $\text{Na}^+$  and  $\text{K}^+$  conductances, while an apical-dendritic/trunk compartment included  
31 persistent  $\text{Na}^+$ , hyperpolarization-activated cation ( $I_h$ ), slow inactivation  $\text{K}^+$ , muscarinic  $\text{K}^+$ , and  
32  $\text{Ca}^{2+}$  L-type. The model replicated the  $\text{Ca}^{2+}$  spike morphology and its critical frequency plus three  
33 other defining features of layer-5 PC synaptic integration: linear frequency-current relationships,  
34 backpropagation-activated  $\text{Ca}^{2+}$  spike firing, and a shift in the critical frequency by blocking  $I_h$ .  
35 Simulating 1,000 synchronized layer-5 PCs, we reproduced the current source density patterns  
36 evoked by  $\text{Ca}^{2+}$ -spikes both with and without  $I_h$  current. Thus, a 2-compartment model with five  
37 non-classic ionic currents in the apical-dendrites reproduces all features of these neurons. We  
38 discuss the utility of this minimal model to study the microcircuitry of agranular areas of the frontal  
39 lobe involved in cognitive control and responsible for event-related potentials such as the error-  
40 related negativity.

## 41 **Key words**

42 pyramidal cells; LFP sources; cortical microcircuitry; biophysical modeling; cognitive  
43 control

44

## 45 **Significance Statement**

46           A tractable model of layer-5 pyramidal cells replicates all known features crucial for distal  
47 synaptic integration in these neurons. This minimal model enables new multi-scale investigations  
48 of microcircuit functions with associated current flows measured by intracranial local field  
49 potentials. It thus establishes a foundation for the future computational evaluation of scalp  
50 electroencephalogram signatures imprinted by  $\text{Ca}^{2+}$  spikes in pyramidal cells, a phenomenon  
51 underlying many brain cognitive processes.

## 52 Introduction

53 Models of the neocortical microcircuit with biophysically plausible pyramidal cells (PC)  
54 are necessary to translate between observed patterns of neural spiking, local field potentials (LFP),  
55 and the derived scalp electroencephalogram (EEG). Layer 5 (L5) PCs have an elongated  
56 morphology with dendrites spanning all cortical layers; hence their synaptic activity causes  
57 laminar current sources (Einevoll et al., 2013; Reimann et al., 2013). The local synchronization of  
58 a large population of L5-PCs produces electric potentials that can be measured on the scalp  
59 (Hämäläinen et al., 1993; Riera et al., 2012). Integrative features of L5-PCs have suggested their  
60 participation in signaling coincident inputs to basal-dendritic/somatic and apical-dendritic regions  
61 (Larkum, 2013). The arrival times of sensory inputs, efferent copies, and task rules in agranular  
62 frontal cortex are critical in cognitive control (Sajad et al., 2019; Subramanian et al., 2019). One  
63 well-characterized cognitive control function is error monitoring by the medial frontal cortex  
64 (Stuphorn et al., 2000; Sajad et al., 2019), which is indexed by an error-related negativity (ERN)  
65 in scalp potentials (Gehring et al., 1993). Therefore, models of L5-PCs will help clarify the  
66 electrogenesis of the ERN.

67 L5-PCs exhibit two distal excitability zones, endowing these neurons with important  
68 integrative features. One excitability zone, at the axon hillock, produces typical  $\text{Na}^+$  action  
69 potentials (AP) and another, in the distal trunk, produces  $\text{Ca}^{2+}$ -spikes (Amitai et al., 1993; Yuste  
70 et al., 1994; Schiller et al., 1997; Larkum and Zhu, 2002). The coincidence of a  $\text{Na}^+$ -AP with an  
71 apical dendritic excitatory postsynaptic potential produces additional APs via a backpropagation-  
72 activated  $\text{Ca}^{2+}$ -spike, “BAC” firing (Larkum et al., 1999b).  $\text{Na}^+$ -APs show a linear frequency-  
73 current (f-I) relation with different sensitivities at the two excitability zones (Larkum et al., 2004).  
74 Dendritic  $\text{Ca}^{2+}$ -spikes generated by strong inputs show a sustained depolarization (Larkum et al.,  
75 2001) that produces high-frequency  $\text{Na}^+$ -APs (Schwindt and Crill, 1999; Williams and Stuart,  
76 1999; Larkum et al., 2001). L5-PCs exhibit a critical frequency (CF) between 60 and 200 Hz for  
77 eliciting  $\text{Ca}^{2+}$ -spikes (Larkum et al., 1999a) via somatic stimulation, which is sensitive to the  
78 hyperpolarization-activated cation current,  $I_h$ , in apical-dendrites (Berger et al., 2001).

79 Previously proposed biophysical models with 2 or 3 neuronal compartments and fewer  
80 conductances explained only isolated features (i.e., the I-f curves - Larkum et al., 2004; the BAC-  
81 firing - Chua et al., 2015; and Yi et al., 2017). Biophysical models of higher complexity accounted  
82 for some combinations of the three major features: the BAC-firing (Rapp et al., 1996; Schaefer et

83 al., 2003; Hay et al., 2011; Bahl et al., 2012; Almog and Korngreen, 2014; Mäki-Marttunen et al.,  
84 2018), the f-I curves (Hay et al., 2011; Bahl et al., 2012; Mäki-Marttunen et al., 2018), and the CF  
85 of  $\text{Ca}^{2+}$ -spikes (Schaefer et al., 2003; Hay et al., 2011; Bahl et al., 2012; Almog and Korngreen,  
86 2014). However, single cell models with many compartments and ionic channels are  
87 computationally expensive to use in large-scale simulations of neocortical networks. Furthermore,  
88 fitting these complex models to LFP/EEG data is practically unattainable, limiting interpretability  
89 and their applications to other research areas. Only one previous model replicated realistic  $[\text{Ca}^{2+}]$   
90 dynamics in the distal-trunk during  $\text{Ca}^{2+}$ -spikes (Mäki-Marttunen et al., 2018). Furthermore, no  
91 previous model has accounted for the  $I_h$  shift of CF, the current source density (CSD) patterns  
92 associated with dendritic  $\text{Ca}^{2+}$ -spikes evoked by somatic stimulation of PCs above the CF, and the  
93 effect of blocking  $I_h$  on these patterns (Suzuki and Larkum, 2017).

94 We describe the simplest possible biophysical model (2-compartments, 7 ionic  
95 conductances) of L5-PCs accounting for all these features. In particular, it reproduced  $\text{Ca}^{2+}$   
96 dynamics above the CF and explained the shift produced by  $I_h$ . The model replicates CSD patterns  
97 obtained from synchronized  $\text{Ca}^{2+}$ -spikes of 1,000 L5-PCs evoked by supra-CF somatic  
98 stimulation. Therefore, this minimal L5-PC model will be crucial for the interpretation of LFP-  
99 CSD/EEG patterns associated with cognitive control based on our understanding of the agranular  
100 laminar microcircuitry (Sajad et al., 2019).

## 101 **Materials and Methods**

### 102 **L5-PC minimal model**

103 We modeled the L5-PC as a 2-compartment neuron with a compartment representing the  
104 basal-dendrites/soma, and another compartment representing its distal-trunk ( $\text{Ca}^{2+}$ -spike initiation  
105 zone) and the apical-dendrites. The trunk is represented by a transfer resistance ( $R_T$ ) between the  
106 two compartments (Figure 1A). The basal-dendritic/somatic compartment includes the classic  
107 Hodgkin-Huxley sodium ( $I_{Na}$ ) and potassium delayed rectifier ( $I_{Kdr}$ ) currents (Hodgkin and  
108 Huxley, 1952). The apical-dendrite/trunk compartment includes persistent  $\text{Na}^+$  current ( $I_{Nap}$ )  
109 (Magistretti and Alonso, 1999),  $\text{Ca}^{2+}$  L-type current ( $I_{CaL}$ ) (Lytton and Sejnowski, 1991),  
110 hyperpolarization-activated non-specific cation current ( $I_h$ ) (Kole et al., 2006), muscarinic  $\text{K}^+$   
111 current ( $I_M$ ) (Adams et al., 1982), and the slow-inactivating potassium current ( $I_{Ks}$ ) (Korngreen

112 and Sakmann, 2000). The membrane potentials of the two compartments are given by the  
 113 following coupled differential equations:

$$C_m^s \frac{dV_s}{dt} = -I_{Na} - I_{Kdr} - I_l^s + \frac{(V_d - V_s)}{R_T} + I_{inj}^s \quad (1)$$

$$C_m^d \frac{dV_d}{dt} = -I_{Nap} - I_{CaL} - I_h - I_M - I_{Ks} - I_l^d + \frac{(V_s - V_d)}{R_T} + I_{inj}^d \quad (2)$$

114 where subscripts  $s$  and  $d$  denote the basal-dendritic/somatic and apical-dendritic/trunk  
 115 compartments, respectively.  $V_i$ ,  $C_m^i$ ,  $I_l^i$  and  $I_{inj}^i$  ( $i \in \{s, d\}$ ) represent the membrane potential,  
 116 membrane capacitance, leak current and injected current for the  $i$ -th compartment, respectively  
 117 (Table 1 – *parameters*). The ionic currents are modeled using the Hodgkin-Huxley formalism in  
 118 which:

$$I_k = g_k m_k^x h_k^y (V_i - E_k) \quad (3)$$

119 where,  $g_k$  is the maximal conductance of the  $k$ -th ionic channel;  $m_k$  and  $h_k$  are its  
 120 activation and inactivation gating variables (Table 2 – *ionic current kinetics*);  $x$  and  $y$  are their  
 121 respective exponents; and  $E_k$  is the equilibrium potential of the  $k$ -th ion. The leak current was  
 122 modeled by  $I_l^i = g_l^i (V_i - E_l^i)$ . All the equilibrium potentials are considered constant, except for  
 123 the equilibrium potential of  $Ca^{2+}$ , which depends on the intracellular  $Ca^{2+}$  concentration  
 124 ( $[Ca^{2+}]_i$ ) through the Nernst equation. Because of ionic diffusion, we treat  $[Ca^{2+}]$  as a stochastic  
 125 variable. Therefore, we added a Wiener noise  $g_{Ca} dW_{Ca}$  to equation (4) using the approach  
 126 described in a previous study (Riera et al., 2011), with  $g_{Ca} = 1 \times 10^{-9}$ .

127 The intracellular  $Ca^{2+}$  concentration dynamics is given by

$$\frac{d[Ca^{2+}]_i}{dt} = - \frac{\gamma k (I_{CaL}(V_d) - I_{CaL}(V_d^r))}{2Fd} - \frac{([Ca^{2+}]_i - [Ca^{2+}]_i^r)}{\tau_R} \quad (4)$$

128 where  $V_d^r$  is the dendritic resting potential,  $[Ca^{2+}]_i^r$  is the intracellular  $Ca^{2+}$  concentration  
 129 at rest,  $\tau_R = 80ms$  is the decay time constant of the intracellular  $Ca^{2+}$  concentration due to active  
 130 transport (Schaefer et al., 2003).  $d = 1 \mu m$  is the depth of the submembrane  $Ca^{2+}$  shell,  $F =$   
 131  $96489 C/mol$  is the Faraday's constant, and  $k = 10,000/A_d$  is the unit conversion constant for

132  $I_{CaL}$  (mA). The surface area  $A_d = 9302.3 \mu m^2$  of the apical-dendrite/trunk compartment was  
133 calculated based on the values given by Larkum et al. (2004) for parameters  $C_m^d$  and  $R_m^d$ .  $\gamma$   
134 represents the fraction of free  $Ca^{2+}$  (not buffered), which was adjusted to reproduce experimental  
135 data for  $[Ca^{2+}]_i$  in the distal-trunk (Larkum et al., 1999a). The basal intracellular  $Ca^{2+}$  was set at  
136 its typical physiological value  $[Ca^{2+}]_i^r = 80 nM$ .

137 \*\*\* Please insert Tables 1 and 2 around here \*\*\*

138 *Frequency-current (f-I) relation*

139 We create the frequency-current (f-I) curves by injecting a noisy staircase current into  
140 either compartment and calculating the somatic firing rate for each current step. The noisy input  
141 current was an Ornstein-Uhlenbeck process (Larkum et al., 2004):

$$I_{inj}^i(t + dt) = I_{inj}^i(t) + \frac{\mu(t) - I_{inj}^i(t)}{\tau} dt + \sigma^i G_t \sqrt{\frac{2dt}{\tau}} \quad (5)$$

142 where  $I_{inj}^i(t)$  is the injected current at the  $i$ -th compartment with mean  $\mu(t)$ , compartment-  
143 dependent standard deviation  $\sigma^i$ , and time correlation length  $\tau$ .  $G_t$  is a random number generated  
144 at each time point from a Gaussian distribution with mean = 0 and standard deviation = 1. We set  
145  $\tau = 3 ms$  as in the experimental study (Larkum et al., 2004), and  $dt$ , the time increment, equal to  
146 the integration time step. The mean  $\mu(t)$  increased over time between 0.2 and 0.75nA as a staircase  
147 function with steps of  $\mu(t) = 0.05nA$  every 2 s.

148 \*\*\* Please insert Figure 1 around here \*\*\*

## 149 **Modeling a population of L5-PCs**

150 In addition to reproducing all main features of PC reported from intracellular recording  
151 studies, we validated its usefulness to model large-scale extracellular electric potentials (e.g., LFP)  
152 generated by cortical microcircuits. To that end, we simulated a neocortical column comprised of  
153 1,000 L5-PCs. For now, they were not connected to each other. Nevertheless, this approach  
154 allowed us to determine the transmembrane ionic current densities (active/returning) and laminar  
155 LFP associated with synchronized apical-dendritic L5-PC  $Ca^{2+}$ -spikes. The laminar LFPs and CSD  
156 patterns were compared with those obtained by Suzuki and Larkum (2017).

157 *Calculating the LFPs*

158 We calculate the LFP from the transmembrane currents generated by a collection of  
 159 neurons using the point-source approximation (Holt and Koch, 1999), which assumes that the  
 160 transmembrane currents through a compartment can be approximated as a single monopolar  
 161 source/sink placed in an extracellular medium at the center of the compartment. To compute the  
 162 transmembrane currents, we divided each compartment into regions (Figure 1B). This approach  
 163 permits the spatial separation of active ionic and passive returning (i.e., capacitive and leak)  
 164 currents. The basal-dendritic/somatic compartment was modeled by three regions: the basal  
 165 dendrites, the axon hillock, and the soma-oblique dendrites. The apical-dendrite/trunk  
 166 compartment was modeled by two regions: the distal trunk (including the main bifurcation point),  
 167 and the tufted apical-dendrites. Each region was represented by a single monopolar current  
 168 source/sink. The ionic and capacitive/leak currents are distributed between these regions as follow:

$$I_1^i = (1 - \alpha_{Kdr}) \cdot I_{Kdr} + (1 - \alpha_C) \cdot (I_C^s + I_l^s) \quad (6)$$

$$I_2^i = I_{Na} \quad (7)$$

$$I_3^i = \alpha_{Kdr} \cdot I_{Kdr} + \alpha_C \cdot (I_C^s + I_l^s) \quad (8)$$

$$I_4^i = I_{CaL} + \alpha_{Ks} \cdot I_{Ks} \quad (9)$$

$$I_5^i = I_h + I_{Nap} + I_M + (1 - \alpha_{Ks}) \cdot I_{Ks} + (I_C^d + I_l^d) \quad (10)$$

169 where  $I_1^i$ ,  $I_2^i$ ,  $I_3^i$ ,  $I_4^i$ , and  $I_5^i$  are the total transmembrane currents (Figure 1B) of the basal  
 170 dendrites (1), axon hillock (2), top soma-oblique dendrites (3), distal trunk (4), and the apical-  
 171 dendrite (5) regions, respectively.  $I_C^s$  and  $I_C^d$  are the somatic and dendritic capacitive currents,  
 172 respectively; and are equal to  $C_m^{\{s,d\}} dV_{\{s,d\}}/dt$ . The distribution of ionic currents in these five  
 173 regions was determined by taking into consideration the following physiological/morphological  
 174 characteristics.

175 First, because of their extensive surface area, returning (i.e., capacitive and leak) currents  
 176 were distributed only in dendrites. The scaling factor  $\alpha_{Kdr}$ ,  $\alpha_C$ , and  $\alpha_{Ks}$  were adjusted to reproduce  
 177 the CSD patterns reported by Suzuki and Larkum (2017). We separated the somatic capacitive and  
 178 the  $I_{Kdr}$  currents into their contribution by the basal and top soma-oblique dendrites. These regions



179 possess a bigger area and a combined higher density of  $I_{Kdr}$  channels than the axon hillock  
180 (Ramaswamy and Markram, 2015). In the axon hillock, we included only the  $\text{Na}^+$  current because  
181 its density in this area is at least 50-fold higher than at proximal dendrites (Ramaswamy and  
182 Markram, 2015). The  $I_{CaL}$  and  $I_{Ks}$  currents were incorporated in the main bifurcation point of the  
183 trunk since this region is the  $\text{Ca}^{2+}$ -spike excitability zone (Larkum et al., 1999b). The  $I_h$  current  
184 was added to the apical dendrite compartment because of its high density in this region (Kole et  
185 al., 2006) and critical influence on synaptically evoked activity in the distal apical dendritic arbor  
186 (Harnett et al., 2015). The  $I_{Nap}$  (Schwindt and Crill, 1995) and  $I_M$  (Hay et al., 2011) currents were  
187 also included in this area because of their role in the amplification/attenuation of synaptic currents  
188 in the distal apical-dendrites. Finally, the capacitive current was added into this region since the  
189 distal dendritic arbor covers a greater area than the  $\text{Ca}^{2+}$ -spike excitability zone (Ramaswamy and  
190 Markram, 2015).

191 We compute the LFPs at 16 equally spaced vertically aligned points to simulate the linear  
192 microelectrode array (Michigan probe) used by Suzuki and Larkum (2017). As in their study, the  
193 inter-electrode distance ( $h$ ) was  $100 \mu\text{m}$ . Motivated by their stimulation protocol with the right-  
194 angled prism, we consider that the linear probe was located at the center of a cylindrical neocortical  
195 column of  $3 \text{ mm}$  in diameter, and with constant and isotropic electrical conductivity  $\sigma =$   
196  $0.323 \text{ S/m}$  (i.e., average across layers from Goto et al., (2010)) (Figure 1C). Given the maximal  
197 current produced by individual PCs, 1,000 L5-PCs were required to generate CSD amplitudes in  
198 the range reported by Suzuki and Larkum (2017). The electric potential at electrode position  $z_e^j$  is  
199 given by (Nicholson and Llinas, 1971):

$$\phi(z_e^j) = \frac{h}{2\sigma} \sum_{i=1}^{N_n} \sum_{n=1}^{N_s} \left( \sqrt{(z_e^j - z_n^i)^2 + (x_n^i)^2 + (y_n^i)^2} - |z_e^j - z_n^i| \right) \cdot \frac{I_n^i(t)}{V} \quad (11)$$

200 where  $I_n^i(t)$  is the transmembrane current generated by the point-source  $n$  of the neuron  $i$ ;  
201  $x_n^i$ ,  $y_n^i$ , and  $z_n^i$  are the coordinates of the point-source  $n$  of the network neuron  $i$ , and  $V$  is the  
202 volume of the cortical column.  $N_n = 1,000$  and  $N_s = 5$  represent the total number of neurons in  
203 the network and the total number of regions in each neuron, respectively. The  $(x_n^i, y_n^i)$  coordinates  
204 of the neurons in the simulated neocortical column were generated randomly from a uniform  
205 distribution. The  $z_n^i$  coordinate of the axon hillock point-source/sink of the network neurons was

206 also generated randomly from a uniform distribution with values between 1.025 mm and 1.450  
207 mm (below the pia matter, Suzuki and Larkum (2017)). The location of the basal-dendrite, trunk  
208 main bifurcation point and apical-dendrite point-sources were calculated relative to the location of  
209 the neurons' axon hillock. The basal dendrites point-source was always 0.15 mm below the axon  
210 hillock, the main bifurcation point of the trunk was always 0.89 mm above the axon hillock  
211 (Ledergerber and Larkum, 2010, Figure 12), and the apical dendrite point-source was 0.15 mm  
212 above the trunk main bifurcation point. The position of the top-soma oblique dendrites,  
213 representing part of the somatic returning currents, was generated randomly with values between  
214 0.7 and 1 mm from the cortical surface. The proposed distribution of point-sources for dendrites  
215 was inspired by morphological data of L5-PCs (Mohan et al., 2015). Wiener noise  $g_k dW_k$  was  
216 added to equations (1) and (2) to instantiate variability in the timing of L5-PC  $\text{Na}^+$ -APs and  $\text{Ca}^{2+}$ -  
217 spikes, with  $g_s = 0.05$  and  $g_d = 0.025$ .

#### 218 *Current source density (CSD) analysis*

219 We estimated the CSD patterns evoked by the simulated LFPs using the spline inverse  
220 CSD method (spline iCSD) (Pettersen et al., 2006). The iCSD methods are based on the inversion  
221 of the solutions of the electrostatics forward problem and assume cylindrical confined and  
222 symmetric CSDs. Specifically, the spline iCSD method assumes a continuously varying CSD  
223 along the recording electrodes, which is calculated by interpolating a set of cubic splines, requiring  
224 the CSD and its first and second derivatives in the vertical direction to be continuous (Pettersen et  
225 al., 2006). It also considers a homogeneous disc distribution in the in-plane ( $x, y$ ) directions. In  
226 agreement with the previous section, a homogeneous and isotropic volume conductor with  
227 extracellular conductivity of  $\sigma = 0.323 \text{ S/m}$  (Goto et al., 2010) was used. Based on L5-PC density  
228 and the CSD peak amplitudes in Suzuki and Larkum (2017), the diameter of the cylindrical source  
229 model was set to 3 mm. The estimated CSD based on the simulated LFPs were convolved with a  
230 Gaussian filter of  $\sigma = 0.1 \text{ mm}$  to produce a spatially smoothed CSD estimate.

#### 231 **Simulations and code accessibility**

232 Simulations were performed in MATLAB (R2018b, MathWorks) with custom-written  
233 scripts. The model equations are solved using the SDETools toolbox for the numerical solution of  
234 stochastic differential equations (<https://github.com/horchler/SDETools>), with a time-step of 1  $\mu\text{s}$ .  
235 All simulation parameters are listed in Table 1 with ionic channel kinetics in Table 2. To calculate

236 the CSD, we created customized scripts that use the functions provided in the CSDplotter toolbox  
237 (<https://github.com/espenhgn/CSDplotter>), which implements the iCSD methods described in  
238 Pettersen et al., (2006). The MATLAB scripts of the model implementation as well as for the LFPs  
239 and CSD calculations are publicly available at ([https://github.com/beaherrera/2-](https://github.com/beaherrera/2-compartments_L5-PC_model)  
240 [compartments\\_L5-PC\\_model](https://github.com/beaherrera/2-compartments_L5-PC_model)).

## 241 **Results**

### 242 **Model testing approach**

243 Traditionally, parameter estimation of L5-PC biophysical models is performed using  
244 quantitative strategies aimed at numerically minimizing model prediction errors while reproducing  
245 transmembrane potential traces in specific experimental paradigms. In some cases, the data are  
246 used to fit channel kinetics (Rapp et al., 1996), while in others (Hay et al., 2011; Bahl et al., 2012;  
247 Almog and Korngreen, 2014; Chua et al., 2015; Mäki-Marttunen et al., 2018) conductance ranges  
248 are fitted with generic optimization methods, based on known channel kinetics. However, such a  
249 quantitative approach is very challenging if biophysical models are used to simultaneously fit data  
250 from multiple experimental paradigms. In such cases, a qualitative trial/error approach based on  
251 electrophysiological knowledge about the effect that each ion channel produces on the data is more  
252 effective (Schaefer et al., 2003; Larkum et al., 2004; Yi et al., 2017). We will use the qualitative  
253 trial/error approach as our goal is to satisfice qualitatively and not satisfy quantitatively six  
254 different properties of L5-PCs (Table 3), which were reported using a variety of experimental  
255 paradigms. We also employed previously known channel kinetics. The rationale used to determine  
256 ionic distributions and conductances is now explained.

257 Ion channels for each compartment were selected based on experimental findings and  
258 modeling studies. In the soma, we included the classic Na<sup>+</sup> and K<sup>+</sup> delayed rectifier channels to  
259 generate the APs (Hodgkin and Huxley, 1952). Previous studies (Lytton and Sejnowski, 1991;  
260 Larkum et al., 2004; Hay et al., 2011; Mäki-Marttunen et al., 2018) reported the need for the after-  
261 hyperpolarization (AHP) current to reproduce the f-I relationship shown experimentally by the L5-  
262 PCs. However, as in Bahl et al., (2012), this current was not needed to explain the f-I relationship.  
263 On the other hand, the  $I_{CaL}$  (Almog and Korngreen, 2009; Pérez-Garci et al., 2013), the  $I_{Nap}$   
264 (Schwindt and Crill, 1995; Crill, 1996) and the  $I_{Ks}$  (Harnett et al., 2013) currents were inserted in  
265 the dendritic compartment to generate the characteristic shape of dendritic Ca<sup>2+</sup>-spikes and in

266 agreement with experimental data.  $I_{CaL}$  defined the amplitude and velocity of the initial  
267 depolarization phase.  $I_{Nap}$  was responsible for the long plateau-like depolarization characteristic  
268 of these spikes, and also essential for the CF effect.  $I_{KS}$  defined both the duration of the  
269 repolarization phase and the amplitude of the  $Ca^{2+}$ -spike's after-hyperpolarization phase. The  $I_h$   
270 current (Kole et al., 2006) was included in the apical-dendrite/trunk compartment to account for  
271 the increase in the resting potential reported in the dendrites of these neurons (Berger et al., 2001).  
272 Moreover, this current plays a significant role in the BAC firing modulation and the synaptic  
273 integration, as well as in the reported changes in both the CF for  $Ca^{2+}$ -spike generation (Berger et  
274 al., 2003) and the CSD pattern evoked by dendritic  $Ca^{2+}$ -spikes (Suzuki and Larkum, 2017).  
275 Finally, the M-current was needed for the spike repolarization phase when staircase input currents  
276 were applied to the apical dendrites. Without this current, the dendritic membrane potential could  
277 not complete the repolarization phase. The voltage dependence of the channel kinetics at the  
278 apical-dendrite/trunk compartment was shifted by +8 mV to account for the shift in the resting  
279 membrane potential.

280 Henceforth, we tested our L5-PC biophysical model in two steps. We first validate the  
281 minimal model by reproducing all known  $Ca^{2+}$ -dependent synaptic facilitation features. We next  
282 assess the capabilities of the model to reproduce the large-scale  $Ca^{2+}$ -spike dependent LFPs  
283 associated with the synchronized activation of a population of L5-PCs in a neocortical column  
284 responding to supra-CF somatic stimulation.

## 285 **Validation of the model**

### 286 *Frequency-current (f-I) relationship*

287 We first investigated whether our model predicts the f-I relationship previously reported  
288 for L5-PCs when either the soma or the distal-trunk region is stimulated (**Figure 2A**, Larkum et  
289 al., (2004)). We injected into the soma or the distal-trunk, a staircase incrementing noisy input  
290 current generated using the Ornstein–Uhlenbeck method (see Materials and Methods), with  
291 standard deviation  $\sigma = 0.2$  nA, or  $\sigma = 0.09$  nA, respectively. Figure 2B shows the somatic AP  
292 response (blue, *top panel*) to the somatic input current (blue, *second panel*). Then, the mean  
293 somatic AP frequency was computed for each current step. Mean and standard errors of the mean  
294 (SEM) over 50 trials were estimated (Figure 2C, blue). Overall, the model predicted a linear f-I  
295 relationship for the somatic input current (dashed blue line, goodness-of-fitting  $R^2 = 0.959$ ) that

296 fell within the range of two experimentally reported studies for L5 PCs (Figure 2C, black  
297 traces/shadow) (Larkum et al., 2004; Bahl et al., 2012). Figure 2B shows the somatic AP response  
298 (blue, *third panel*) to the dendritic input current (red, *bottom panel*), and Figure 2C compares  
299 observed with simulated values. The model also predicted a linear f-I relationship for dendritic  
300 input current (dashed red line, goodness-of-fitting  $R^2 = 1.00$ ). In agreement with experimental data  
301 (Larkum et al., 2004), current injections at the trunk must be  $\sim 300$  pA larger than those needed at  
302 the soma to produce the same AP frequency in these L5-PCs. This effect was quantified using  
303 parameter  $\Delta I$  (Figure 2D), which was calculated for all somatic AP rates from simulated (N = 6,  
304  $\Delta I = 0.3142 \pm 0.0140$  nA) and experimental (N = 6,  $\Delta I = 0.3333 \pm 0.0258$  nA) data. This difference  
305 was statistically insignificant ( $t(5) = 2.0789$ ,  $p = 0.0922$ , two-tailed paired t-test) demonstrating  
306 the model represents adequately the experimental f-I relationships. However, our model predicted  
307 a threshold for somatic AP initiation of  $\sim 0.35$  nA at trunk current injection sites, which was smaller  
308 than that of  $\sim 0.5$  nA reported experimentally. This negative finding could be explained by the  
309 difference in the injection site along the trunk of the actual L5-PCs used in the experiments  
310 (Larkum et al., 2004). Current injections at sites relatively distant to the trunk bifurcation site will  
311 require larger amplitudes as the density of CaL channels might be lower. In our model, the  
312 mimicked injection was consistently performed at the level of that bifurcation lowering the  
313 threshold required to achieve somatic AP firing.

314 \*\*\* Please insert Figure 2 around here \*\*\*

### 315 *Back-propagating AP activated Ca<sup>2+</sup>-spike (BAC) firing*

316 Next, we examined how the L5-PC biophysical model responds and integrates inputs into  
317 the distal-trunk and soma (**Figure 3A**) at different times. Firstly, we stimulated the distal-trunk  
318 with a subthreshold current generated from a double exponential function of the form  
319  $(1 - \exp(-t/\tau_2)) \cdot \exp(-t/\tau_1)$  with  $\tau_1 = 2$  ms and  $\tau_2 = 10$  ms, and an amplitude of 0.29 nA.  
320 In agreement with experimental studies (Larkum et al., 1999b; Schaefer et al., 2003), only a small  
321 somatic and apical-dendritic/trunk depolarization were evoked by this current injection (Figure  
322 3B). Second, we injected a threshold current pulse (duration: 5 ms, amplitude: 1 nA) into the  
323 soma, which elicited an AP that propagated back to the apical-dendrite/trunk compartment creating  
324 a dendritic depolarization but no Ca<sup>2+</sup>-spike (**Figure 3**). Third, we tested the model response when  
325 both stimuli were combined. We applied the somatic current pulse and 1 ms later the subthreshold

326 current at the trunk. This resulted in the generation of an AP, a dendritic  $\text{Ca}^{2+}$ -spike, and another  
327 somatic AP following the onset of the dendritic  $\text{Ca}^{2+}$ -spike (Figure 3D). We could also evoke  
328 dendritic  $\text{Ca}^{2+}$  spikes by supra-threshold current injections to the trunk (Figure 3E).

329 \*\*\* Please insert Figure 3 around here\*\*\*

330 *Critical frequency (CF) for  $\text{Ca}^{2+}$ -spike generation*

331 We next investigated the influence of the frequency of short somatic current stimulation  
332 on  $\text{Ca}^{2+}$ -spikes occurrence. To that end, we simulated the soma stimulation with trains of brief  
333 supra-threshold pulses (2 ms) at different frequencies eliciting trains of somatic APs. As  
334 previously reported (Larkum et al., 1999a; Berger et al., 2003), only AP trains above a CF (149 Hz  
335 in the model) evoked  $\text{Ca}^{2+}$ -spikes. Figure 4A illustrates the somatic and apical-dendrite/trunk  
336 responses to somatic stimulation below and at the CF. Figure 4B shows the intracellular  $\text{Ca}^{2+}$   
337 concentration dynamics for both stimulation paradigms, which resemble experimental data  
338 (Larkum et al., 1999a).

339 \*\*\* Please insert Figure 4 around here \*\*\*

340 We also studied how the CF varied with the presence or absence of the  $I_h$  current in the  
341 distal apical dendrites. We simulated a L5-PC without  $I_h$  current at the apical-dendrite/trunk  
342 compartment responding to the same trains of supra-threshold currents at the soma with different  
343 frequencies. To quantify the CF, we measured the area below the dendritic voltage traces and  
344 plotted them as a function of AP frequency. When the  $I_h$  current was blocked relative to present,  
345 the CF was lower by about 40 Hz (Figure 4C). Furthermore, we compared the CF values with and  
346 without the  $I_h$  current predicted by our model with those predicted by experimental data from  
347 eleven L5-PCs (Berger et al., 2003) (Figure 4D). In both the observed and simulated data, the CF  
348 is reduced at least by 30-40 Hz when the  $I_h$  current is blocked. The CFs predicted by our model are  
349 slightly higher than the mean observed CFs, but they fell within the observed range.

### 350 **Reproducing $\text{Ca}^{2+}$ -spike dependent local field potentials**

351 To examine the capabilities of this minimal L5-PC model, we tested whether non-synaptic  
352 events such as  $\text{Ca}^{2+}$ -spikes can be detected in the evoked LFPs as reported by Suzuki and Larkum,  
353 (2017). To that end, we simulated a collection of 1,000 model L5-PCs (Figure 1C). In the  
354 experimental paradigm, simultaneous stimulation of the soma of L5 PCs was achieved using an  
355 optogenetic approach (Suzuki and Larkum, 2017); hence, no synaptic connections were considered

356 in our simulations. The simulated L5-PCs were stimulated with a noisy, 20 ms duration, current  
357 pulse with a mean amplitude that generates AP trains at a frequency above the CF. The mean input  
358 current was strong enough to generate somatic AP trains and therefore evoked dendritic  $\text{Ca}^{2+}$ -  
359 spikes (Figure 5A). Figure 5B shows the raster plots and associated post-stimulus time histograms  
360 of 100 randomly selected L5-PCs (top), with the timing for typical  $\text{Na}^+$ -APs and  $\text{Ca}^{2+}$ -spikes. After  
361 the somatic stimulation ceased, somatic  $\text{Na}^+$ -APs were only elicited because of the non-linear  
362 changes in the somatic-dendritic gain of these cells.

363 Figure 5C illustrates the averaged LFPs evoked by optogenetic stimulation of the collection  
364 over 10 trials. We observed an early sink between 1.0-1.3 mm below the pia matter, which was  
365 accompanied by two sources, one stronger between 0.7-0.9 mm and another weaker between 1.4-  
366 1.6 mm. According to our model, the sink was caused by large  $I_{\text{Na}}$  inward currents at the level of  
367 the axon hillock due to the optogenetically induced APs. The two sources were caused by a  
368 combination of  $I_{\text{Kdr}}$  and the returning capacitive/leak outward currents through the top soma-  
369 oblique dendrites and the basal dendrites. The relative amplitudes of these two sources can be  
370 adjusted by means of parameters  $\alpha_{\text{Kdr}}$  and  $\alpha_{\text{C}}$ . To create **Figure 5**, these parameters were set to  
371 0.5 and 1/3, respectively. We also observed a 20-30 ms delayed sink between 0.3-0.6 mm below  
372 the pia matter, which was accompanied by a very superficial (0.1-0.2 mm) source, also delayed.  
373 This late sink appeared during the same interval in which the collection of L5 PCs generated more  
374  $\text{Ca}^{2+}$ -spikes (Figure 5B bottom). Hence, we believe it was caused by the  $I_{\text{CaL}}$  inward current.

375 According to our model, the superficial sources resulted from a combination of  $I_{\text{M}}$ ,  $I_{\text{KS}}$ , and  
376 the returning capacitive/leak outward currents through the apical-dendrites. Because of its reversal  
377 potential, the cation current  $I_{\text{h}}$  could be either a source or a sink during a  $\text{Ca}^{2+}$ -spike at a very  
378 superficial level. The relative amplitude of this delayed sink-source was adjusted using parameter  
379  $\alpha_{\text{KS}} = 1$  to reproduce a similar CSD pattern as that reported by Suzuki and Larkum (2017). The  
380 CSD analysis clearly revealed the presence of such a sink/source current density distribution  
381 (Figure 5D, right color map panel ( $I_{\text{h}}$ ) and expanded plot, respectively). Since we did not consider  
382 synaptic connections between the L5-PCs, the above results suggest that the late sink is associated  
383 with the dendritic  $\text{Ca}^{2+}$ -spikes.

384 \*\*\* Please insert Figure 5 around here \*\*\*

385 Finally, we investigated the influence of the  $I_h$  current on the source-sink pattern generated  
386 by the dendritic  $\text{Ca}^{2+}$ -spikes. We repeated the simulations, but now without the  $I_h$  current in the  
387 apical-dendritic compartment (Figure 5D). In agreement with the experimental data (Suzuki and  
388 Larkum, 2017), we found that the amplitude of the delayed sink in layer 2/3 is significantly  
389 increased by blocking the  $I_h$  current ( $p = 0.0089$ , Wilcoxon signed-rank test,  $N = 10$  trials). Since  
390 the superficial source in Suzuki and Larkum (2017) was very close to the pia boundary, we believe  
391 the iCSD method used by the authors might have misestimated this source. Therefore, we did not  
392 compare the experimental effect of blocking  $I_h$  on that superficial sources with that predicted by  
393 our model. The cation current  $I_h$  was too small in amplitude to produce any detectable change in  
394 the CSD when blocked. However, this current was crucial to produce a shifted resting membrane  
395 potential of +10 mV (Figure 1C) in the apical-dendrite/trunk compartment, which disappeared  
396 when  $I_h$  was blocked. As the trunk resting membrane potential became more negative, the effect  
397 of  $I_{CaL}$  was larger between 25-35 ms after stimulation (**Figure 5D**), producing a more intense  
398 delayed sink during  $\text{Ca}^{2+}$ -spiking at the level of the L5-PC trunk.

## 399 Discussion

400 Synaptic integration in apical dendrites of L5-PCs is facilitated by several unique  
401 characteristics of these neurons: **(i)** the f-I curves with differentiated sensitivity for the soma and  
402 distal trunk, **(ii)** the BAC firing-based amplification of coincident apical-dendritic inputs, **(iii)** the  
403 CF effect for eliciting  $\text{Ca}^{2+}$ -spikes in the distal trunk, and **(iv)** its related increases in intracellular  
404  $[\text{Ca}^{2+}]_i$  in apical-dendrites strengthening NMDA synaptic efficacy. Biophysical models with  
405 different level of complexity have been proposed to account for single L5-PC features (Rapp et  
406 al., 1996; Larkum et al., 2004; Chua et al., 2015; Yi et al., 2017) or combinations of features  
407 (Schaefer et al., 2003; Hay et al., 2011; Bahl et al., 2012; Almog and Korngreen, 2014; Mäki-  
408 Marttunen et al., 2018). Models explaining combinations of features require many compartments  
409 to capture realistic L5-PC morphology and more than four ionic channels per compartment, which  
410 substantially increase the computational cost and time (Table 3). Consequently, using these models  
411 in large-scale simulations of collections of L5-PCs requires special computational resources and  
412 extensive time. Moreover, fitting them to large-scale electrophysiological data (e.g., LFP and  
413 EEG) will be challenging, limiting interpretability and applications to other research areas. Also,  
414 no previous model has accounted for the shift in the CF due to the influence of  $I_h$ , explained the



415 CSD patterns associated with dendritic  $\text{Ca}^{2+}$ -spikes evoked by somatic stimulation of PCs above  
416 the CF, or the effect on these patterns of blocking  $I_h$  (Suzuki and Larkum, 2017). We proposed a  
417 2-compartment model of L5-PCs with just seven ion channels that explain qualitatively all  
418 abovementioned features.

419 \*\*\* Please insert Table 3 around here \*\*\*

## 420 **Layer 2/3 PCs vs. layer 5 PCs**

421 Does our model account for characteristics of PCs in layer 2/3 (L2/3)? Even though they  
422 share many electrophysiological properties, L2/3-PCs have distinct features that differentiate their  
423 role in the cortical microcircuit (Larkum et al., 2007). Similar to L5-PCs, L2/3-PCs have  
424 excitability zones in both the axon initial segment and the distal apical dendrites. These act as two  
425 different functional compartments that allow these neurons to associate inputs coming to the distal  
426 apical dendrites with those coming to the soma or basal dendrites. Large  $\text{Ca}^{2+}$  influx and  
427 regenerative dendritic potentials are also evoked by back-propagating action potentials above a  
428 CF. Moreover, as in L5-PCs (Pérez-Garci et al., 2006), GABAergic inhibitory inputs to the distal  
429 apical dendrites cause long-lasting reduction of dendritic activity. However, unlike L5-PCs, L2/3-  
430 PCs do not show long plateau-like dendritic depolarizations. Consequently, brief dendritic spikes  
431 have less influence on somatic AP output. In fact, isolated dendritic potentials in response to supra-  
432 threshold dendritic stimulation are more common than dendritic spikes coupled to a somatic AP.  
433 Furthermore, though coincident inputs to both functional compartments reduce the threshold for  
434 dendritic spike generation, stronger dendritic inputs are needed to evoke an extra somatic AP. In  
435 addition, L2/3-PCs display little attenuation in the dendritic response to long current injections  
436 suggesting a low density of  $I_h$  channels in the dendrites, described as sag by Larkum et al. (2007).

## 437 **Functional Implications: Microcircuitry underlying cognitive control**

438 Cognitive control involves the suppression of automatic or impulsive behavior for  
439 successful goal-directed behavior. Some models of cognitive control formalize this function as the  
440 co-activation of two conflicting action plans, which need to be resolved for correct performance  
441 (Botvinick et al., 2001). Coincidence detection can also support *error detection* – a mismatch (or  
442 conflict) between task goals and actual behavior – and *prediction error* – a mismatch between  
443 expected and experienced outcomes (Alexander and Brown, 2011; Bastos et al., 2012; Cohen,  
444 2014). Human and macaque electrophysiology experiments have characterized a negativity in

445 scalp potentials associated with these cognitive functions (Gehring et al., 1993). Two components:  
446 an N2 for conflict detection and the ERN for error detection. While the N2 and ERN are indices  
447 of cognitive control, studying signal processing at the microcircuit level is essential to  
448 understanding actual mechanisms (Cohen, 2017). Our biophysical model offers a powerful tool to  
449 test different hypotheses and instantiate circuit models motivated by recent research sampling  
450 neural spiking and LFP across frontal cortical layers (Chandrasekaran et al., 2017; Bastos et al.,  
451 2018; Sajad et al., 2019).

452         Recent models have proposed that conflict detection can be achieved by the detection of  
453 coincident synaptic inputs in the medial frontal cortex (Alexander and Brown, 2011; Cohen, 2014;  
454 Dembrow et al., 2015). L5-PCs can provide the neural substrate for the coincidence detection as  
455 they have large dendritic trees that allow for integration across inputs from cognitive, limbic, and  
456 motor structures (Huerta and Kaas, 1990; London and Häusser, 2005; Morecraft et al., 2012; Beul  
457 and Hilgetag, 2015). Recently, we found that following errors in the stop-signal task, in a medial  
458 frontal area, error-related neural spiking was first observed in putative pyramidal neurons in L5  
459 and lower L3 (Sajad et al., 2019) concurrent with sinks in current in the superficial layers where  
460 these neurons extend their dendrites (Sajad et al., 2017). Figure 6 diagrams our conjecture on the  
461 role of L5-PCs in error detection in agranular cortex guided by the knowledge of the microcircuitry  
462 and known anatomical connections. L5-PCs can detect the coincidence of an efferent copy of the  
463 motor command from the mediodorsal thalamus and the task rule from prefrontal cortex (Sajad et  
464 al., 2019). A mismatch between the two signals can result in spiking activity that can project  
465 extrinsically to other structures (Barbas, 2015) and intrinsically to other neurons in the microcircuit  
466 (Douglas et al., 1995; Haeusler and Maass, 2007; Kajikawa and Schroeder, 2011). L5-PCs are  
467 densely interconnected with each other (not shown) resulting in rapid synchronous excitation of a  
468 large number of L5-PCs upon receiving input currents (Hempel et al., 2000; Wang et al., 2006;  
469 Morecraft et al., 2012). L5-PCs are also connected to inhibitory interneurons, which result in the  
470 control of this excitation. Noteworthy, recent evidence suggests inhibitory neurons in agranular  
471 cortex support more intra- than inter-laminar connections (Kätzel et al., 2011; Beul and Hilgetag,  
472 2015). Hence, the inter-laminar inhibitory projections depicted in Figure 6 represent inhibitory  
473 influences that are likely mediated by additional PCs and interneurons in L3 and L5 (not shown).

474         Previous studies have suggested that the patterns of interconnectivity of PCs and their  
475 inhibition, particularly by the somatostatin-positive neurons, is important for controlled patterns

476 of theta-band rhythmogenesis in the medial frontal cortex (Mainen and Sejnowski, 1996; Cohen,  
477 2014), and its genesis has been associated with the role of the  $I_h$  current (Ulrich, 2002). Also,  
478 intrinsic signal processing, involving inhibition of L5-PCs by interneurons in the upper layers has  
479 been associated with the generation of gamma oscillations (Buzsáki and Wang, 2012; Bastos et  
480 al., 2018). These oscillations result in scalp potential reflections of the gamma rhythm as well as  
481 the theta rhythm, one the hallmarks of error and conflict detection (Tallon-Baudry and Bertrand,  
482 1999; Cohen and Donner, 2013).

483 \*\*\* Please insert Figure 6 around here \*\*\*

484 While Figure 6 provides one explanation for signal flow within the microcircuit, it is far  
485 from complete and relies on untested assumptions. For instance, the location where inputs to L5-  
486 PCs converge and the mechanism for how these signals are integrated at the biophysical level  
487 remains technically challenging to study (Stuart and Spruston, 2015). Furthermore, the interaction  
488 between L5-PCs and other neurons in the microcircuit remains unclear. The biophysical model  
489 proposed in the current study provides an essential tool for further testing between and refining  
490 competing hypotheses. Future work needs also the development of similar biophysical models for  
491 L2/3-PCs and other neurons in the microcircuitry.

#### 492 **A necessary step towards understanding the origin of the ERN**

493 The proposed model will be useful for another research goal of developing a forward model  
494 of the ERN component. Clearly, the EEG arises from the activity of neurons in the brain tissue,  
495 but the detailed relationship to activity within neocortex remains unclear (Riera et al., 2012;  
496 Einevoll et al., 2013; Reimann et al., 2013). Recently, we have shown that error-related spiking  
497 activity of neurons in the upper layers, but not lower layers of monkey supplementary eye field  
498 predicts the magnitude of the ERN (Sajad et al., 2019). Also, recent work recording from single  
499 neurons in humans have shown coupling between error neuron activity and intracranial EEG (Fu  
500 et al., 2019). Somatic action potentials are unlikely to directly influence the EEG due to their  
501 voltage dynamics; however, bursts of action potentials from a large population of neurons can  
502 influence the EEG (Buzsáki et al., 2012). Furthermore, the large-scale EEG topography of  $Ca^{2+}$ -  
503 spikes remains unknown (Suzuki and Larkum, 2017). The proposed biophysical model of L5-PC  
504 can be used to directly examine how current flow resulting from neuronal activity within the  
505 microcircuit, down to fine details of current dynamics, can result in LFP and scalp EEG (Riera et  
506 al., 2012). Establishing a link between specific microcircuit motifs and fluctuations in the scalp

507 potentials can render ERN more effective markers of specific cortical processes and stronger  
508 diagnostic tools for patients with compromised cognitive control functions.

## 509 **References**

- 510 Adams PR, Brown DA, Constanti A (1982) M-currents and other potassium currents in bullfrog  
511 sympathetic neurones. *J Physiol* 330:537–572.
- 512 Alexander WH, Brown JW (2011) Medial prefrontal cortex as an action-outcome predictor. *Nat*  
513 *Neurosci* 14:1338–1344.
- 514 Almog M, Korngreen A (2009) Characterization of voltage-gated Ca<sup>2+</sup> conductances in layer 5  
515 neocortical pyramidal neurons from rats. *PLoS One* 4:e4841.
- 516 Almog M, Korngreen A (2014) A Quantitative Description of Dendritic Conductances and Its  
517 Application to Dendritic Excitation in Layer 5 Pyramidal Neurons. *J Neurosci* 34:182–196.
- 518 Amitai Y, Friedman A, Gutnick MJ, Connors BW (1993) Regenerative activity in apical dendrites  
519 of pyramidal cells in neocortex. *Cereb Cortex* 3:26–38.
- 520 Bahl A, Stemmler MB, Herz AVM, Roth A (2012) Automated optimization of a reduced layer 5  
521 pyramidal cell model based on experimental data. *J Neurosci Methods* 210:22–34.
- 522 Barbas H (2015) General Cortical and Special Prefrontal Connections: Principles from Structure  
523 to Function. *Annu Rev Neurosci* 38:269–289.
- 524 Bastos AM, Loonis R, Kornblith S, Lundqvist M, Miller EK (2018) Laminar recordings in frontal  
525 cortex suggest distinct layers for maintenance and control of working memory. *Proc Natl*  
526 *Acad Sci U S A* 115:1117–1122.
- 527 Bastos AM, Usrey WM, Adams RA, Mangun GR, Fries P, Friston KJ (2012) Canonical  
528 Microcircuits for Predictive Coding. *Neuron* 76:695–711.
- 529 Berger T, Larkum ME, Lüscher H-R (2001) High  $I_h$  Channel Density in the Distal Apical Dendrite  
530 of Layer V Pyramidal Cells Increases Bidirectional Attenuation of EPSPs. *J Neurophysiol*  
531 85:855–868.
- 532 Berger T, Senn W, Lüscher H-R (2003) Hyperpolarization-Activated Current  $I_h$  Disconnects  
533 Somatic and Dendritic Spike Initiation Zones in Layer V Pyramidal Neurons. *J Neurophysiol*  
534 90:2428–2437.
- 535 Beul SF, Hilgetag CC (2015) Towards a “Canonical” agranular cortical microcircuit. *Front*  
536 *Neuroanat* 8:1–8.

- 537 Botvinick MM, Carter CS, Braver TS, Barch DM, Cohen JD (2001) Conflict monitoring and  
538 cognitive control. *Psychol Rev* 108:624–652.
- 539 Buzsáki G, Anastassiou CA, Koch C (2012) The origin of extracellular fields and currents--EEG,  
540 ECoG, LFP and spikes. *Nat Rev Neurosci* 13:407–420.
- 541 Buzsáki G, Wang X-J (2012) Mechanisms of Gamma Oscillations. *Annu Rev Neurosci* 35:203–  
542 225.
- 543 Chandrasekaran C, Peixoto D, Newsome WT, Shenoy K V. (2017) Laminar differences in  
544 decision-related neural activity in dorsal premotor cortex. *Nat Commun* 8:1–16.
- 545 Chua Y, Morrison A, Helias M (2015) Modeling the calcium spike as a threshold triggered fixed  
546 waveform for synchronous inputs in the fluctuation regime. *Front Comput Neurosci* 9:1–18.
- 547 Cohen MX (2014) A neural microcircuit for cognitive conflict detection and signaling. *Trends*  
548 *Neurosci* 37:480–490.
- 549 Cohen MX (2017) Where Does EEG Come From and What Does It Mean? *Trends Neurosci*  
550 40:208–218.
- 551 Cohen MX, Donner TH (2013) Midfrontal conflict-related theta-band power reflects neural  
552 oscillations that predict behavior. *J Neurophysiol* 110:2752–2763.
- 553 Crill WE (1996) Persistent Sodium Current in Mammalian Central Neurons. *Annu Rev Physiol*  
554 58:349–362.
- 555 Dembrow NC, Zemelman B V., Johnston D (2015) Temporal dynamics of l5 dendrites in medial  
556 prefrontal cortex regulate integration versus coincidence detection of afferent inputs. *J*  
557 *Neurosci* 35:4501–4514.
- 558 Douglas RJ, Koch C, Mahowald M, Martin KAC, Suarez HH (1995) Recurrent excitation in  
559 neocortical circuits. *Science* (80- ) 269:981–985.
- 560 Einevoll GT, Kayser C, Logothetis NK, Panzeri S (2013) Modelling and analysis of local field  
561 potentials for studying the function of cortical circuits. *Nat Rev Neurosci* 14:770–785.
- 562 Fu Z, Wu DAJ, Ross I, Chung JM, Mamelak AN, Adolphs R, Rutishauser U (2019) Single-Neuron  
563 Correlates of Error Monitoring and Post-Error Adjustments in Human Medial Frontal Cortex.  
564 *Neuron* 101:165-177.e5.
- 565 Gehring WJ, Goss B, Coles MGH, Meyer DE, Donchin E (1993) A Neural System for Error  
566 Detection and Compensation. *Psychol Sci* 4:385–390.
- 567 Goto T, Hatanaka R, Ogawa T, Sumiyoshi A, Riera J, Kawashima R (2010) An evaluation of the

- 568 conductivity profile in the somatosensory barrel cortex of wistar rats. *J Neurophysiol*  
569 104:3388–3412.
- 570 Haeusler S, Maass W (2007) A statistical analysis of information-processing properties of lamina-  
571 specific cortical microcircuit models. *Cereb Cortex* 17:149–162.
- 572 Hämäläinen M, Hari R, Ilmoniemi RJ, Knuutila J, Lounasmaa O V (1993)  
573 Magnetoencephalography theory, instrumentation, and applications to noninvasive studies of  
574 the working human brain. *Rev Mod Phys* 65:413–497.
- 575 Harnett MT, Magee JC, Williams SR (2015) Distribution and function of HCN channels in the  
576 apical dendritic tuft of neocortical pyramidal neurons. *J Neurosci* 35:1024–1037.
- 577 Harnett MT, Xu NL, Magee JC, Williams SR (2013) Potassium channels control the interaction  
578 between active dendritic integration compartments in layer 5 cortical pyramidal neurons.  
579 *Neuron* 79:516–529.
- 580 Hay E, Hill S, Schürmann F, Markram H, Segev I (2011) Models of neocortical layer 5b pyramidal  
581 cells capturing a wide range of dendritic and perisomatic active properties. *PLoS Comput*  
582 *Biol* 7:e1002107.
- 583 Hempel CM, Hartman KH, Wang XJ, Turrigiano GG, Nelson SB (2000) Multiple forms of short-  
584 term plasticity at excitatory synapses in rat medial prefrontal cortex. *J Neurophysiol* 83:3031–  
585 3041.
- 586 Hodgkin AL, Huxley AF (1952) A Quantitative Description of Membrane Current and Its  
587 Application to Conduction and Excitation in Nerve. *J Physiol* 117:500–544.
- 588 Holt GR, Koch C (1999) Electrical interactions via the extracellular potential near cell bodies. *J*  
589 *Comput Neurosci* 6:169–184.
- 590 Huerta MF, Kaas JH (1990) Supplementary eye field as defined by intracortical microstimulation:  
591 Connections in macaques. *J Comp Neurol* 293:299–330.
- 592 Kajikawa Y, Schroeder CE (2011) How local is the local field potential? *Neuron* 72:847–858.
- 593 Kätzel D, Zemelman B V., Buettnering C, Wölfel M, Miesenböck G (2011) The columnar and  
594 laminar organization of inhibitory connections to neocortical excitatory cells. *Nat Neurosci*  
595 14:100–109.
- 596 Kole MHP, Hallermann S, Stuart GJ (2006) Single Ih Channels in Pyramidal Neuron Dendrites:  
597 Properties, Distribution, and Impact on Action Potential Output. *J Neurosci* 26:1677–1687.
- 598 Korngreen A, Sakmann B (2000) Voltage-gated K<sup>+</sup> channels in layer 5 neocortical pyramidal

- 599 neurones from young rats: Subtypes and gradients. *J Physiol* 525:621–639.
- 600 Larkum M (2013) A cellular mechanism for cortical associations: An organizing principle for the  
601 cerebral cortex. *Trends Neurosci* 36:141–151.
- 602 Larkum ME, Kaiser KMM, Sakmann B (1999a) Calcium electrogenesis in distal apical dendrites  
603 of layer 5 pyramidal cells at a critical frequency of back-propagating action potentials. *Proc*  
604 *Natl Acad Sci* 96:14600–14604.
- 605 Larkum ME, Senn W, Lüscher HR (2004) Top-down dendritic input increases the gain of layer 5  
606 pyramidal neurons. *Cereb Cortex* 14:1059–1070.
- 607 Larkum ME, Waters J, Sakmann B, Helmchen F (2007) Dendritic spikes in apical dendrites of  
608 neocortical layer 2/3 pyramidal neurons. *J Neurosci* 27:8999–9008.
- 609 Larkum ME, Zhu JJ (2002) Signaling of layer 1 and whisker-evoked Ca<sup>2+</sup> and Na<sup>+</sup> action  
610 potentials in distal and terminal dendrites of rat neocortical pyramidal neurons in vitro and in  
611 vivo. *J Neurosci* 22:6991–7005.
- 612 Larkum ME, Zhu JJ, Sakmann B (1999b) A new cellular mechanism for coupling inputs arriving  
613 at different cortical layers. *Nature* 398:338–341.
- 614 Larkum ME, Zhu JJ, Sakmann B (2001) Dendritic mechanisms underlying the coupling of the  
615 dendritic with the axonal action potential initiation zone of adult rat layer 5 pyramidal  
616 neurons. *J Physiol* 533:447–466.
- 617 Ledergerber D, Larkum ME (2010) Properties of Layer 6 Pyramidal Neuron Apical Dendrites. *J*  
618 *Neurosci* 30:13031–13044.
- 619 London M, Häusser M (2005) DENDRITIC COMPUTATION. *Annu Rev Neurosci* 28:503–532.
- 620 Lytton W, Sejnowski TJ (1991) Simulations of Cortical Pyramidal Neurons Synchronized by  
621 Inhibitory Interneurons. *J Neurophysiol* 66:1059–1079.
- 622 Magistretti J, Alonso A (1999) Biophysical properties and slow voltage-dependent inactivation of  
623 a sustained sodium current in entorhinal cortex layer-II principal neurons. A whole-cell and  
624 single-channel study. *J Gen Physiol* 114:491–509.
- 625 Mainen ZF, Sejnowski TJ (1996) Influence of dendritic structure on firing pattern in model  
626 neocortical neurons. *Nature* 382:363–366.
- 627 Mäki-Marttunen T, Halmes G, Devor A, Metzner C, Dale AM, Andreassen OA, Einevoll GT  
628 (2018) A stepwise neuron model fitting procedure designed for recordings with high spatial  
629 resolution: Application to layer 5 pyramidal cells. *J Neurosci Methods* 293:264–283.

- 630 Mohan H, Verhoog MB, Doreswamy KK, Eyal G, Aardse R, Lodder BN, Goriounova NA,  
631 Asamoah B, B. Brakspear ABC, Groot C, van der Sluis S, Testa-Silva G, Obermayer J,  
632 Boudewijns ZSRM, Narayanan RT, Baayen JC, Segev I, Mansvelder HD, de Kock CPJ  
633 (2015) Dendritic and Axonal Architecture of Individual Pyramidal Neurons across Layers of  
634 Adult Human Neocortex. *Cereb Cortex* 25:4839–4853.
- 635 Morecraft RJ, Stilwell-Morecraft KS, Cipolloni PB, Ge J, McNeal DW, Pandya DN (2012)  
636 Cytoarchitecture and cortical connections of the anterior cingulate and adjacent somatomotor  
637 fields in the rhesus monkey. *Brain Res Bull* 87:457–497.
- 638 Nicholson C, Llinas R (1971) Field potentials in the alligator cerebellum and theory of their  
639 relationship to Purkinje cell dendritic spikes. *J Neurophysiol* 34:509–531.
- 640 Pérez-Garci E, Gassmann M, Bettler B, Larkum ME (2006) The GABAB1b Isoform Mediates  
641 Long-Lasting Inhibition of Dendritic Ca<sup>2+</sup> Spikes in Layer 5 Somatosensory Pyramidal  
642 Neurons. *Neuron* 50:603–616.
- 643 Pérez-Garci E, Larkum ME, Nevian T (2013) Inhibition of dendritic Ca<sup>2+</sup> spikes by GABAB  
644 receptors in cortical pyramidal neurons is mediated by a direct Gi/o-βγ-subunit interaction  
645 with Cav1 channels. *J Physiol* 591:1599–1612.
- 646 Pettersen KH, Devor A, Ulbert I, Dale AM, Einevoll GT (2006) Current-source density estimation  
647 based on inversion of electrostatic forward solution: Effects of finite extent of neuronal  
648 activity and conductivity discontinuities. *J Neurosci Methods* 154:116–133.
- 649 Ramaswamy S, Markram H (2015) Anatomy and physiology of the thick-tufted layer 5 pyramidal  
650 neuron. *Front Cell Neurosci* 9:1–29.
- 651 Rapp M, Yarom Y, Segev I (1996) Modeling back propagating action potential in weakly excitable  
652 dendrites of neocortical pyramidal cells. *Proc Natl Acad Sci* 93:11985–11990.
- 653 Reimann MW, Anastassiou CA, Perin R, Hill SL, Markram H, Koch C (2013) A biophysically  
654 detailed model of neocortical local field potentials predicts the critical role of active  
655 membrane currents. *Neuron* 79:375–390.
- 656 Riera J, Hatanaka R, Uchida T, Ozaki T, Kawashima R (2011) Quantifying the uncertainty of  
657 spontaneous Ca<sup>2+</sup> oscillations in astrocytes: Particulars of Alzheimer’s disease. *Biophys J*  
658 101:554–564.
- 659 Riera JJ, Ogawa T, Goto T, Sumiyoshi A, Nonaka H, Evans A, Miyakawa H, Kawashima R (2012)  
660 Pitfalls in the dipolar model for the neocortical EEG sources. *J Neurophysiol* 108:956–975.



- 661 Sajad A, Godlove D, Schall J (2017) Microcircuitry of Performance Monitoring. bioRxiv:187989.
- 662 Sajad A, Godlove DC, Schall JD (2019) Cortical microcircuitry of performance monitoring. *Nat*  
663 *Neurosci* 22:265–274.
- 664 Schaefer AT, Larkum ME, Sakmann B, Roth A (2003) Coincidence Detection in Pyramidal  
665 Neurons Is Tuned by Their Dendritic Branching Pattern. *J Neurophysiol* 89:3143–3154.
- 666 Schiller J, Schiller Y, Stuart G, Sakmann B (1997) Calcium action potentials restricted to distal  
667 apical dendrites of rat neocortical pyramidal neurons. *J Physiol* 505:605–616.
- 668 Schwindt P, Crill W (1999) Mechanisms Underlying Burst and Regular Spiking Evoked by  
669 Dendritic Depolarization in Layer 5 Cortical Pyramidal Neurons. *J Neurophysiol* 81:1341–  
670 1354.
- 671 Schwindt PC, Crill WE (1995) Amplification of synaptic current by persistent sodium conductance  
672 in apical dendrite of neocortical neurons. *J Neurophysiol* 74:2220–2224.
- 673 Stuart GJ, Spruston N (2015) Dendritic integration: 60 years of progress. *Nat Neurosci* 18:1713–  
674 1721.
- 675 Stuphorn V, Taylor TL, Schall JD (2000) Performance monitoring by the supplementary eye field.  
676 *Nature* 408:857–860.
- 677 Subramanian D, Alers A, Sommer MA (2019) Corollary Discharge for Action and Cognition. *Biol*  
678 *Psychiatry Cogn Neurosci Neuroimaging* 4:782–790.
- 679 Suzuki M, Larkum ME (2017) Dendritic calcium spikes are clearly detectable at the cortical  
680 surface. *Nat Commun* 8:1–11.
- 681 Ulrich D (2002) Dendritic resonance in rat neocortical pyramidal cells. *J Neurophysiol* 87:2753–  
682 2759.
- 683 Wang Y, Markram H, Goodman PH, Berger TK, Ma J, Goldman-Rakic PS (2006) Heterogeneity  
684 in the pyramidal network of the medial prefrontal cortex. *Nat Neurosci* 9:534–542.
- 685 Williams SR, Stuart GJ (1999) Mechanisms and consequences of action potential burst firing in  
686 rat neocortical pyramidal neurons. *J Physiol* 521:467–482.
- 687 Yi G, Wang J, Wei X, Deng B (2017) Action potential initiation in a two-compartment model of  
688 pyramidal neuron mediated by dendritic Ca<sup>2+</sup> spike. *Sci Rep* 7:1–16.
- 689 Yuste R, Gutnick MJ, Saar D, Delaney KR, Tank DW (1994) Ca<sup>2+</sup> accumulations in dendrites of  
690 neocortical pyramidal neurons: An apical band and evidence for two functional  
691 compartments. *Neuron* 13:23–43.

## 692 **Figure and Table Legends**

693 **Figure 1.** *Illustration of the biophysical model, LFP estimation and simulated neocortical column.*

694 **A** – Equivalent circuit of the 2-compartment biophysical model. The first and second portions of  
695 the circuit represent the basal-dendritic/somatic and apical-dendritic/trunk compartments,  
696 respectively. The lengthy trunk is represented by the transfer resistance ( $R_T$ ) between the  
697 compartments. Each ionic channel ( $k$ -th) is represented by an electromotive force  $E_k$  (i.e., the ion  
698 equilibrium potential) and a voltage-dependent conductance  $g_k$  in parallel. **B** – Illustration of the  
699 forward-modeling used for LFP estimation from the compartmental model of the L5-PCs. To  
700 compute the transmembrane currents, the cell was divided into five current source/sink regions  
701 (indicated by rectangles). The position of the point source/sink representing the compartment of a  
702 neuron is given by the parameter  $\mathbf{r}_n = \{x_n, y_n, z_n\}$ . The position of a representative electrode is  
703 given by the parameter  $\mathbf{r}_e = \{x_e, y_e, z_e\}$ . **C** – Diagram of the simulated cortical column formed by  
704 a collection of 1,000 L5 PCs. The somas were distributed randomly in the tangential dimension of  
705 layer 5. The mean (standard deviation) depth of the neurons was 1.04 (0.22) *mm* from the pia  
706 matter. The simulated cortical column had a diameter of 3 *mm* and a total depth of 1.6 *mm*. As  
707 previously reported (Berger et al., 2001), we used a resting membrane potential of -65 *mV* at the  
708 somatic compartment, which drifted to -55 *mV* at the apical-dendritic/trunk compartment due to  
709 the presence of the  $I_h$  current.

710 **Figure 2.** *Frequency - Input ( $f$ - $I$ ) relationship.* **A** – Micrograph of a L5-PC with recording locations  
711 at the soma (*blue*) and distal trunk (*red*) indicated with diagram pipettes. **B** – Somatic AP responses  
712 (1<sup>st</sup> and 3<sup>rd</sup> panels) to the staircase incremented noisy input current (2<sup>nd</sup> and 4<sup>th</sup> panels) injected  
713 into the soma (*blue*) and distal trunk (*red*). **C** – Observed (*black*, Larkum et al., 2004; Bahl et al.,  
714 2012) AP firing frequency as a function of the mean input current. The range of observed values  
715 is highlighted by a gray fill. Simulated mean and SEM spike rate over 50 trials for each current  
716 step in the soma (*blue*) or distal trunk (*red*) compartment. Superimposed are observed (*black*  
717 *dashed*) and simulated (*blue and red dashed*) linear regressions. **D** – Current differences ( $\Delta I$ )  
718 between the  $f$ - $I$  curves for somatic and distal trunk stimulation to produce the same  $\text{Na}^+$ -AP firing  
719 frequency. No significant differences were found between the observed  $\Delta I$ , numerically estimated  
720 from Larkum et al., (2004) and that predicted by the model ( $t(5) = 2.0789$ ,  $p = 0.0922$ , paired two-  
721 tailed t-test).

722 **Figure 3.** *Back-propagating AP activated  $Ca^{2+}$ -spike firing.* **A** – Micrograph of a L5-PC with  
723 recording locations at the soma (*blue*) and distal trunk (*red*) indicated with a schematic pipette. **B**  
724 – Simulated (left) and observed (right, Schaefer et al., (2003)) subthreshold current injected into  
725 the apical dendrites creates only subthreshold somatic and dendritic depolarization. **C** – Simulated  
726 and observed suprathreshold somatic current pulse elicits an AP that propagates back to the apical  
727 dendrites creating a dendritic depolarization but no dendritic  $Ca^{2+}$ -spike. **D** – Simulated and  
728 observed combined somatic and tuft stimulation evokes an AP, a dendritic  $Ca^{2+}$ -spike, and another  
729 somatic AP following the onset of the dendritic  $Ca^{2+}$ -spike. **E** – Simulated and observed  
730 suprathreshold stimulation of distal apical dendrites evokes a dendritic  $Ca^{2+}$ -spike. Scales in C are  
731 common for all simulated (left) and observed (right) results. Red: apical-dendrite/trunks, Black:  
732 basal-dendrites/soma, and Dashed Line: dendritic threshold.

733 **Figure 4.** *Effect of somatic stimulation frequency on dendritic  $Ca^{2+}$ -spike occurrence.* **A** – A  
734 simulated train of brief suprathreshold pulses at frequencies of 100 Hz (left) and 149 Hz (right)  
735 (top) was injected into soma eliciting a train of APs (*black*, below). Only the 149 Hz train evoked  
736 a dendritic  $Ca^{2+}$ -spike (*red*, below). **B** – Intracellular dendritic  $Ca^{2+}$  concentration during somatic  
737 stimulation at 100 Hz (left) and 149 Hz (right). Blue lines indicate the  $Ca^{2+}$  concentration at each  
738 time instant of the dendritic voltage traces indicated in panel A. **C** – Integrated area below the  
739 dendritic voltage traces as a function of the AP frequency with (blue) and without (black) blocking  
740 the  $I_h$  current. CFs of 105 Hz and 149 Hz were obtained when  $I_h$  was present and absent,  
741 respectively. **D** – Observed shift in CF after blocking  $I_h$  for eleven cells (black circles, numerically  
742 estimated from Berger et al., (2003)) and simulated with the model (blue diamonds).

743 **Figure 5.** *LFP and CSD derived from dendritic  $Ca^{2+}$ -spikes in a collection of L5-PCs.* **A** – Basal-  
744 dendritic/somatic (black,  $V_s$ ) and apical-dendritic/trunk (red,  $V_d$ ) simulated responses of a  
745 collection of 1,000 L5-PCs to suprathreshold optogenetic stimulation above the CF. **B** – Raster  
746 plots (top) and post-stimulus time histogram (bottom) of 100 randomly selected L5-PCs (top)  
747 showing spike times of  $Na^+$ -APs (black) and  $Ca^{2+}$ -spikes (red). The total number of  $Na^+$ -AP and  
748  $Ca^{2+}$ -spike events every 5ms is shown (bar plots, bottom). **C** – LFPs evoked by the simulated  
749 optogenetic stimulation of the collection of L5 PCs calculated on an array of 16 microelectrodes  
750 (100  $\mu m$  separation). Voltage traces at each depth are averaged over 10 simulated trials. The black

751 rectangle indicates the delayed sink associated with the dendritic  $\text{Ca}^{2+}$ -spike. **D** – CSD analysis of  
752 the evoked LFPs averaged over 10 trials without (left) and with (right) the  $I_h$  current. The top right  
753 panel expands the selected area to reveal the delayed sink associated with the  $\text{Ca}^{2+}$ -spikes arising  
754 earliest 0.4 mm below the pia matter. Middle right panel plots averaged  $I_{\text{CaL}}$  current in the trunk  
755 of the L5-PCs, showing an amplitude increase 25-35 ms after stimulation when  $I_h$  was blocked.  
756 Lower right panel compares the average with SEM of the amplitude of this current sink with and  
757 without blocking the  $I_h$  current, which was significantly different ( $p = 0.0089$ , Wilcoxon signed-  
758 rank test,  $N = 10$  trials). The blue bar in all the plots indicates the time window for the optogenetic  
759 stimulation.

760 **Figure 6.** *Cortical microcircuit for coincidence detection underlying cognitive control.* The  
761 simplified diagram of circuitry embedding a L5-PC (blue) in agranular cortex with soma (triangle)  
762 located in L5, dendrites that extend up to L1, and axons (blue arrows) that project both intrinsically,  
763 innervating inhibitory neurons (red) and other pyramidal neurons (not shown) in the microcircuit,  
764 and extrinsically, innervating other brain areas. This figure illustrates how dendritic dynamics can  
765 contribute to an error signal. An efferent copy of a motor command is delivered through a  
766 feedforward thalamic pathway, terminating on the L5-PC soma and apical dendrite. A task rule  
767 signal from prefrontal cortex is delivered through a feedback pathway, terminating on the L5-PC  
768 apical dendrites. The soma of a L5-PC (blue triangle) generates  $\text{Na}^+$ -APs that propagate  
769 intracortically to Martinotti cells (ovals) and other inhibitory interneurons (star). The Martinotti  
770 cells terminate on the L5-PC apical dendrites, while the other interneuron terminates on the soma.  
771 Note that because inhibitory neurons in agranular cortex largely make intra-laminar projections,  
772 the inter-laminar inhibitory projections depicted here (dashed red lines) represent connections that  
773 are likely mediated by additional PCs and interneurons in L3 and L5 (not shown). The dynamics  
774 of this connectivity induces  $\text{Ca}^{2+}$  spikes, which amplify the coincidence of the efferent copy and  
775 the task rule to generate an error signal. These neuronal events are signaled by the generation of  
776 theta band LFP from deeper layers and gamma band LFP from superficial layers (indicated by  
777 labeled oscillations).  
778

779 **Table 1:** *Parameters used for the simulations.* The first column indicates the ionic channels per  
780 compartment. The second and third columns show the maximum conductance and equilibrium  
781 potential for each ionic channel, respectively. The exponents of the activation (x) and inactivation  
782 gating are indicated in the fourth column. Electrotonic parameters (capacitances/resistances) are  
783 also shown.

784 **Table 2:** The gating kinetics for each ionic channel.

785 **Table 3:** *Summary of previous/current biophysical models used to describe the principal features*  
786 *of L5-PCs.* The first, second, third and fourth columns show the study, number of compartments,  
787 number of ionic channels and the platform used to create the simulated data for each study. The  
788 fifth column list the features that were explained by each study. The column “Ions” provides the  
789 following information  $N_s: N_c/c$ , where  $N_s$  and  $N_c$  are the number of ionic species considered and  
790 the number of ionic channels per compartment, respectively. In some cases, the number of ionic  
791 channels per compartment depends on the regions of the neuron considered. Acronyms: IF –  
792 Integrated and Fire Model; S – Soma; AD – Apical Dendrites; BD – Basal Dendrites; T – Trunk;  
793 and  $A_h$  – Axon Hillock.  
794

795 Table 1

|                                                                  | $g_k$ ( $\mu S$ ) | $E_k$ (mV)                                                         | (x,y) |
|------------------------------------------------------------------|-------------------|--------------------------------------------------------------------|-------|
| <b>Somatic Compartment</b>                                       |                   |                                                                    |       |
| $C_m^s = 0.26$ nF, $R_m^s = 50$ M $\Omega$ (Larkum et al., 2004) |                   |                                                                    |       |
| <b>Na</b>                                                        | 18                | 50                                                                 | (3,1) |
| <b>Kdr</b>                                                       | 5                 | -85                                                                | (0,4) |
| <b>Leak</b>                                                      | $1/R_m^s$         | -31.5                                                              | (0,0) |
| <b>Dendritic Compartment</b>                                     |                   |                                                                    |       |
| $C_m^d = 0.12$ nF, $R_m^d = 43$ M $\Omega$ (Larkum et al., 2004) |                   |                                                                    |       |
| <b>Nap</b>                                                       | 0.022             | 50                                                                 | (3,1) |
| <b>CaL</b>                                                       | 3.85              | $\frac{RT}{zF} \ln \left( \frac{[Ca^{2+}]_o}{[Ca^{2+}]_i} \right)$ | (2,0) |
| <b>h</b>                                                         | 0.865             | -45                                                                | (1,0) |
| <b>M</b>                                                         | 1                 | -85                                                                | (1,0) |
| <b>Ks</b>                                                        | 28                | -85                                                                | (2,1) |
| <b>Leak</b>                                                      | $1/R_m^d$         | -48.1                                                              | (0,0) |
| $R_T = 65$ M $\Omega$ (Larkum et al., 2004)                      |                   |                                                                    |       |
| $[Ca^{2+}]_o = 2$ mM                                             |                   |                                                                    |       |

796

797 Table 2

| Ionic Current                      | Gating variables                                                                    |
|------------------------------------|-------------------------------------------------------------------------------------|
| <i>Na</i>                          | $\alpha_m = 0.1 \cdot (V + 40) / (1 - \exp(-(V + 40)/10))$                          |
|                                    | $\beta_m = 4 \cdot \exp(-(V + 65)/18)$                                              |
|                                    | $\alpha_h = 0.07 \cdot \exp(-(V + 65)/20)$                                          |
|                                    | $\beta_h = 1 / (1 + \exp(-(V + 35)/10))$                                            |
| <i>Kdr</i>                         | $\alpha_m = 0.01 \cdot (V + 55) / (1 - \exp(-(V + 55)/10))$                         |
|                                    | $\beta_m = 0.125 \cdot \exp(-(V + 65)/80)$                                          |
| <i>Nap</i>                         | $m_\infty = 1 / (1 + \exp(-(V + 52.6)/4.6))$                                        |
|                                    | $\alpha_m = 0.182 \cdot (V + 38) / (1 - \exp(-(V + 38)/6))$                         |
|                                    | $\beta_m = (-0.124 \cdot (V + 38)) / (1 - \exp((V + 38)/6))$                        |
|                                    | $\tau_m = \frac{6}{T_{adj}(\alpha_m + \beta_m)}$                                    |
|                                    | $h_\infty = 1 / (1 + \exp(-(V + 52.6)/4.6))$                                        |
|                                    | $\alpha_h = -2.88 \times 10^{-6} \cdot (V + 17) \cdot (1 - \exp((V + 17)/4.63))$    |
|                                    | $\beta_h = -6.94 \times 10^{-6} \cdot (V + 64.4) \cdot (1 - \exp((V + 64.4)/2.63))$ |
| <i>CaL</i>                         | $\alpha_m = 1.6 / (\exp(-0.072 \cdot (V - 5)) + 1)$                                 |
|                                    | $\beta_m = 0.02 \cdot (V + 8.69) \cdot (\exp((V + 8.69)/5.36) - 1)$                 |
| <i>Ks</i>                          | $m_\infty = 1 / (1 + \exp(-(V + 11)/12))$                                           |
|                                    | $\tau_m = (1.25 + 175.03 \cdot \exp(0.026(V + 10))) / T_{adj}$ , for $V < -60$      |
|                                    | $\tau_m = (1.25 + 13 \cdot \exp(-0.026(V + 10))) / T_{adj}$ , otherwise             |
|                                    | $h_\infty = 1 / (1 + \exp(-(V + 64)/11))$                                           |
| <i>h</i>                           | $\tau_h = 360 + (1010 + 24 \cdot (V + 65)) \cdot \exp(-((V + 85)/48)^2)$            |
|                                    | $\alpha_m = 0.00643 \cdot (V + 154.9) / (\exp((V + 154.9)/11.9) - 1)$               |
| <i>M</i>                           | $\beta_m = 0.00193 \cdot \exp(V/33.1)$                                              |
|                                    | $\alpha_m = 0.0033 \cdot \exp(0.1(V + 35))$                                         |
|                                    | $\beta_m = 0.0033 \cdot \exp(-0.1(V + 35))$                                         |
|                                    | $\tau_m = \frac{1}{T_{adj}(\alpha_m + \beta_m)}$                                    |
| $T_{adj} = 2.3^{\frac{34-21}{10}}$ |                                                                                     |

798

799 Table 3.

| Study                         | Geometry   | Compartment                                  | Ions                                                                              | Platform     | Features Explained                                                                                      |
|-------------------------------|------------|----------------------------------------------|-----------------------------------------------------------------------------------|--------------|---------------------------------------------------------------------------------------------------------|
| (Rapp et al., 1996)           | Realistic  | >>1,000                                      | 2: 2/c<br><b>Total &gt;&gt;2,000</b>                                              | NEURON       | BAC firing                                                                                              |
| (Larkum et al., 2004)         | Simplified | 2                                            | 2: 1/c, +IF model<br><b>Total = 2</b>                                             | Not reported | f-I curves                                                                                              |
| (Schaefer et al., 2003)       | Realistic  | 8                                            | 7: 6/c<br><b>Total = 48</b>                                                       | NEURON       | BAC firing<br>CF                                                                                        |
| (Hay et al., 2011)            | Realistic  | 199                                          | 8: 8/c S(1),<br>6/c AD(198)<br><b>Total = 1,196</b>                               | NEURON       | BAC firing<br>CF<br>f-I curves                                                                          |
| (Bahl et al., 2012)           | Realistic  | 14                                           | 8: 1/c A <sub>n</sub> (5), 5/c S(1),<br>1/c BD(1), 4/c AD(7)<br><b>Total = 39</b> | NEURON       | BAC firing<br>f-I curves                                                                                |
| (Almog and Korngreen, 2014)   | Realistic  | Many<br>Compartments<br>50 $\mu$ m in length | 8: 8/c<br><b>Total = Many</b>                                                     | NEURON       | BAC firing<br>CF                                                                                        |
| (Chua et al., 2015)           | Simplified | 3                                            | 1: 1/c AD,<br>+ IF model<br><b>Total = 1</b>                                      | NEST         | BAC firing                                                                                              |
| (Yi et al., 2017)             | Simplified | 2                                            | 3: 2/c S(1), 1/c AD(1)<br><b>Total = 3</b>                                        | MATLAB       | f-I curves                                                                                              |
| (Mäki-Marttunen et al., 2018) | Realistic  | 4                                            | 10: 9/c S(1),<br>1/c BD(1), 7/c AD(2)<br><b>Total = 24</b>                        | NEURON       | BAC firing<br>f-I curves<br>[Ca <sup>2+</sup> ] <sub>i</sub>                                            |
| <b>This study</b>             | Minimum    | 2                                            | 7: 2/c BD/S(1),<br>5/c AD/T(1)<br><b>Total = 7</b>                                | MATLAB       | BAC firing<br>CF<br>f-I curves<br>[Ca <sup>2+</sup> ] <sub>i</sub><br>I <sub>h</sub> effect<br>CSD maps |



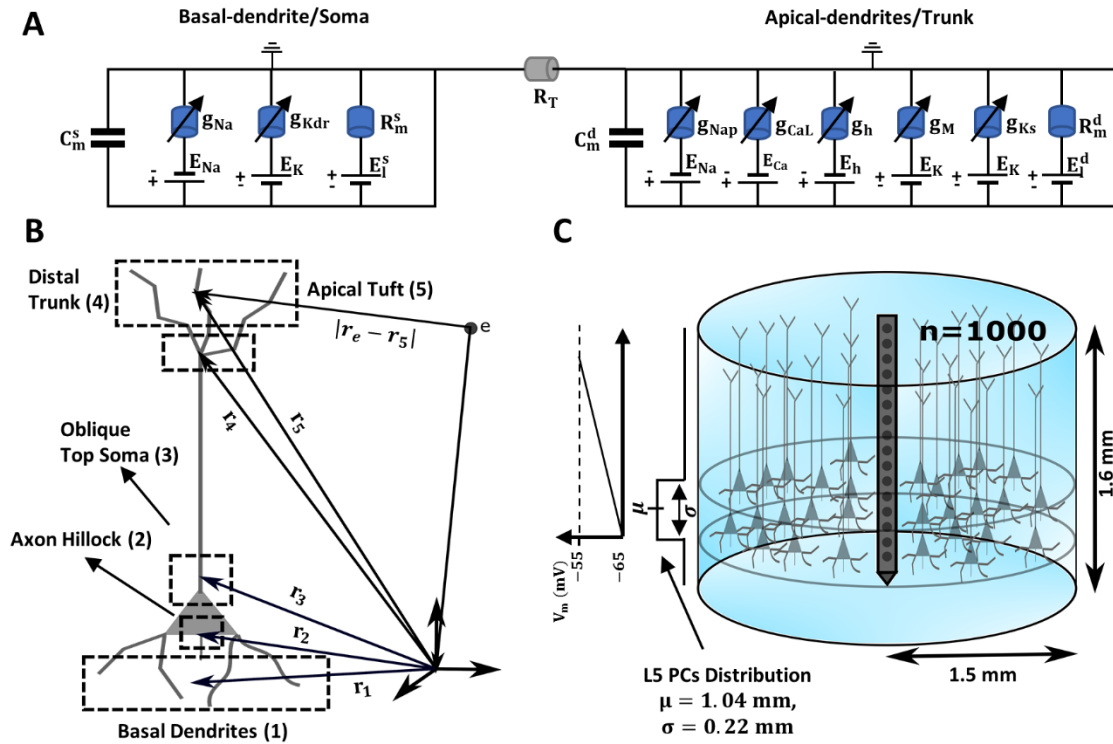

801

802 **Figure 1**

803

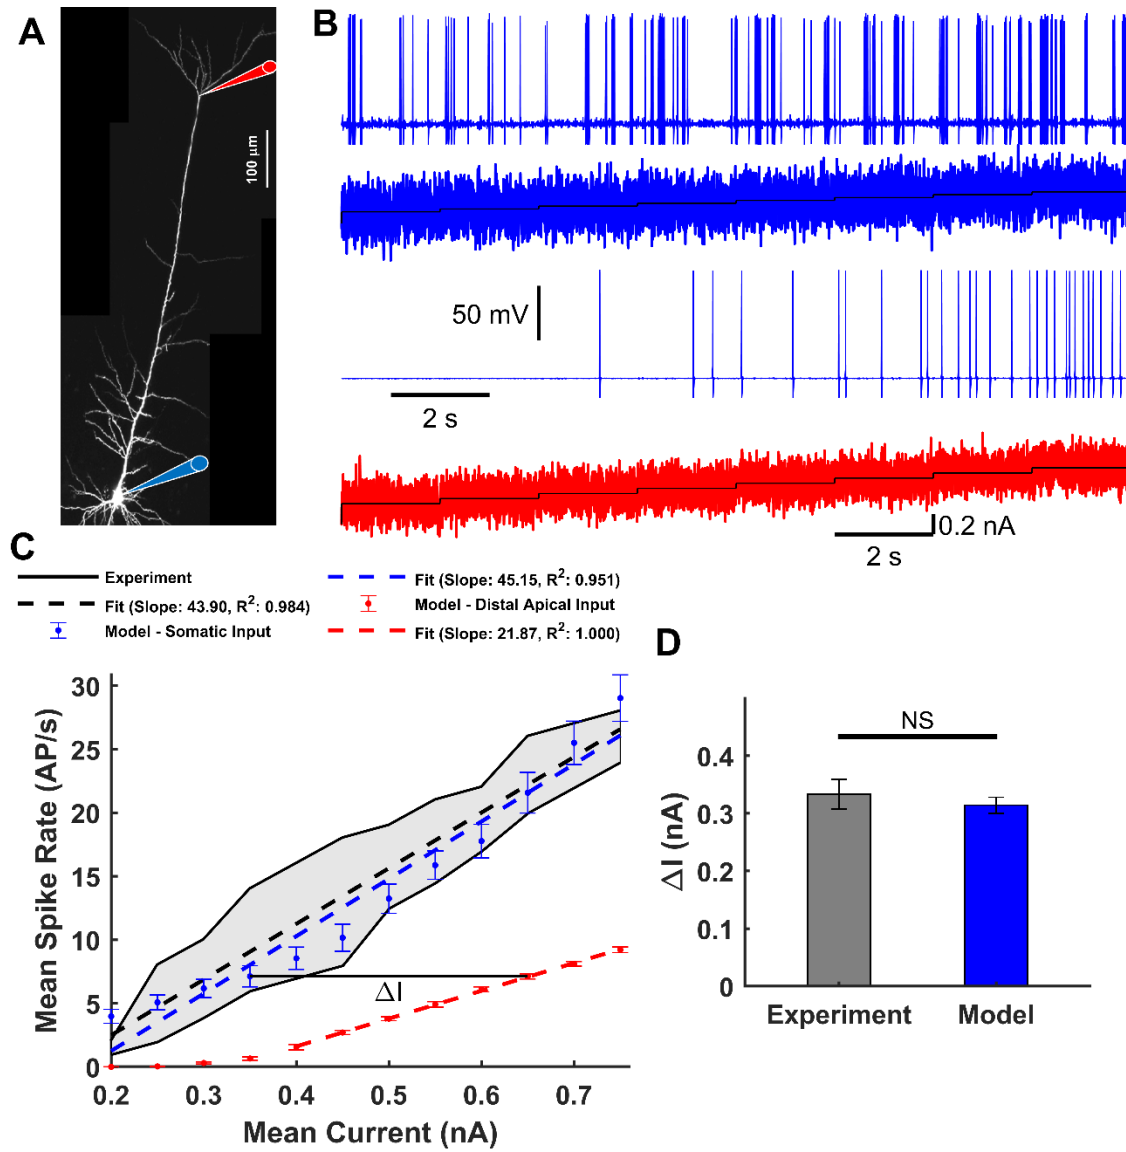

804

805 **Figure 2**

806

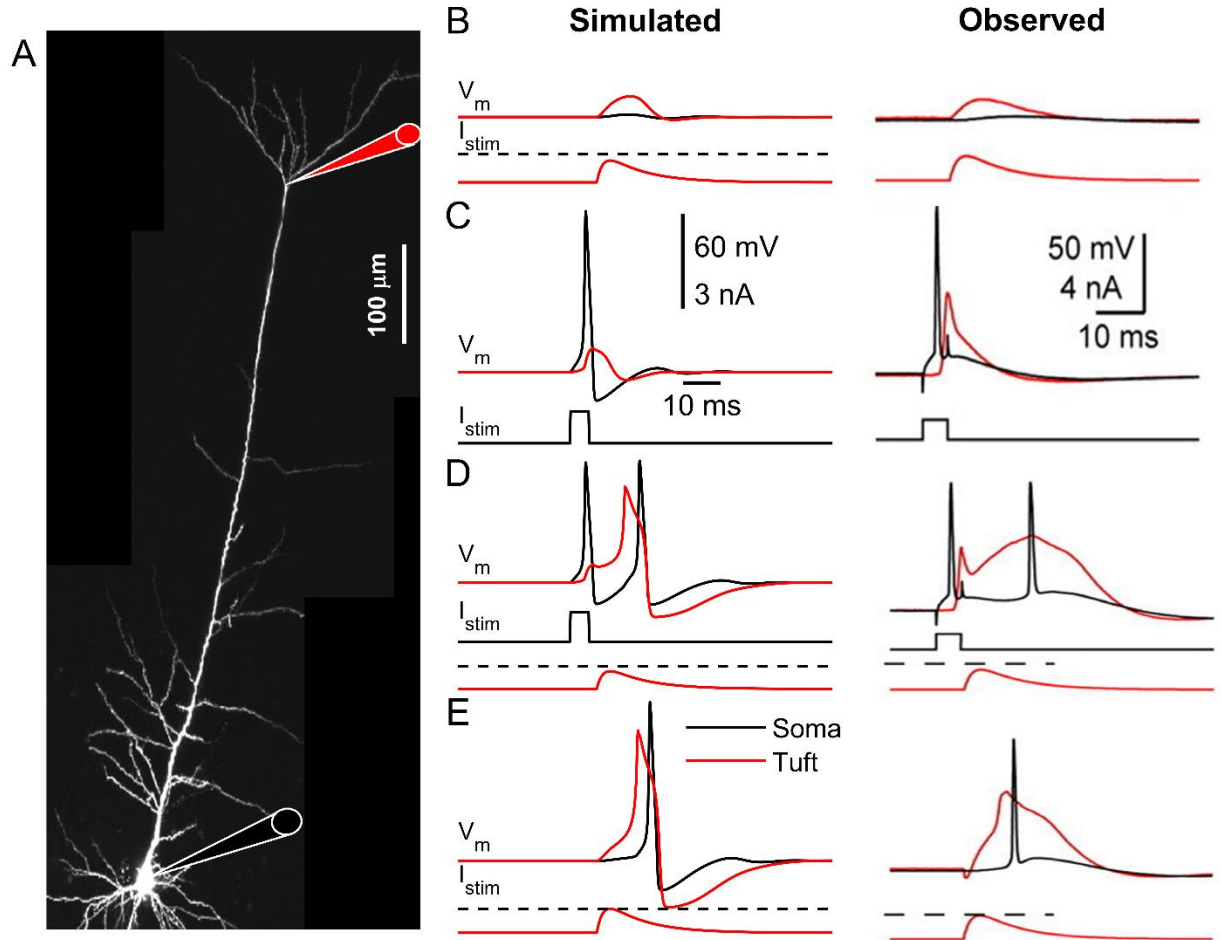

807

808 **Figure 3**

809

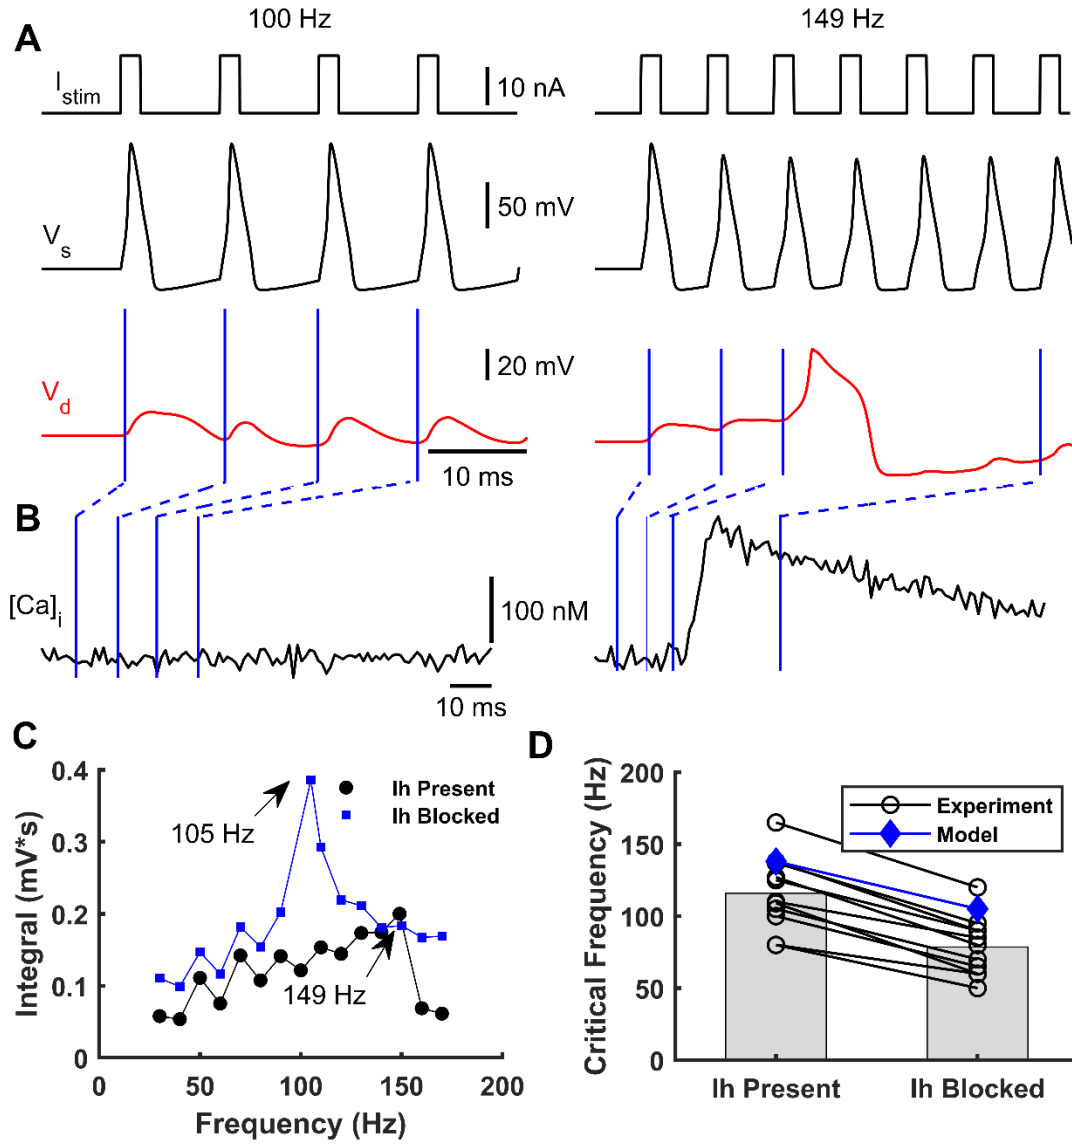

810

811 **Figure 4**

812

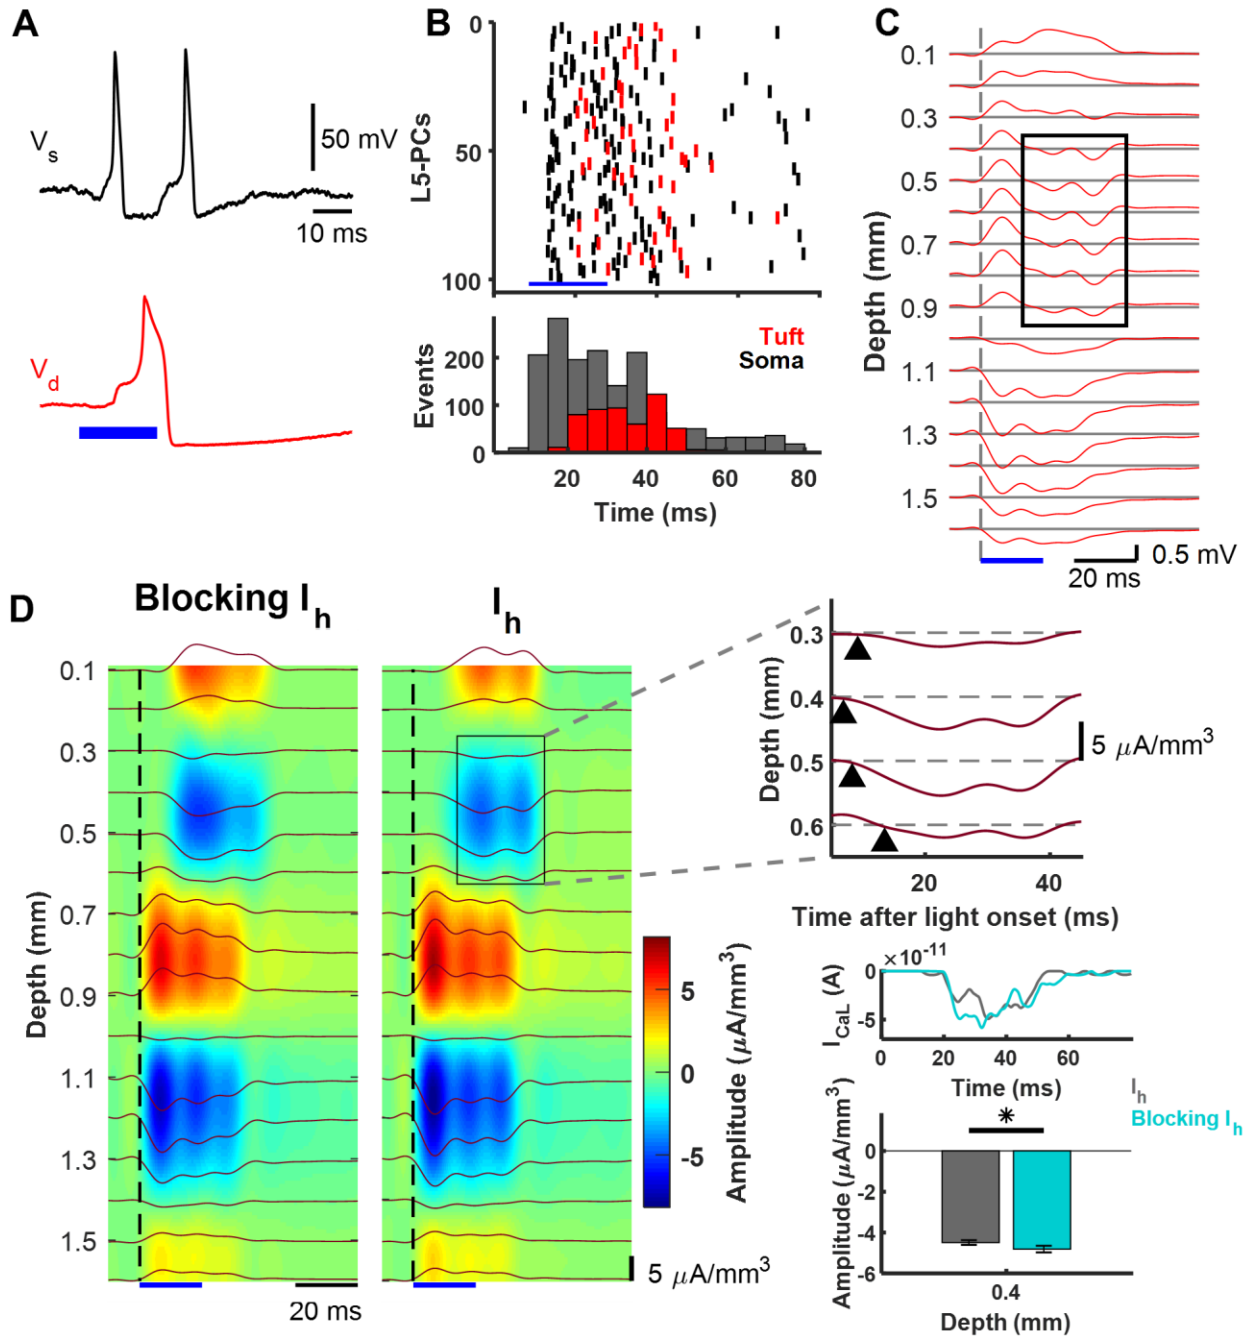

813

814 **Figure 5**

815

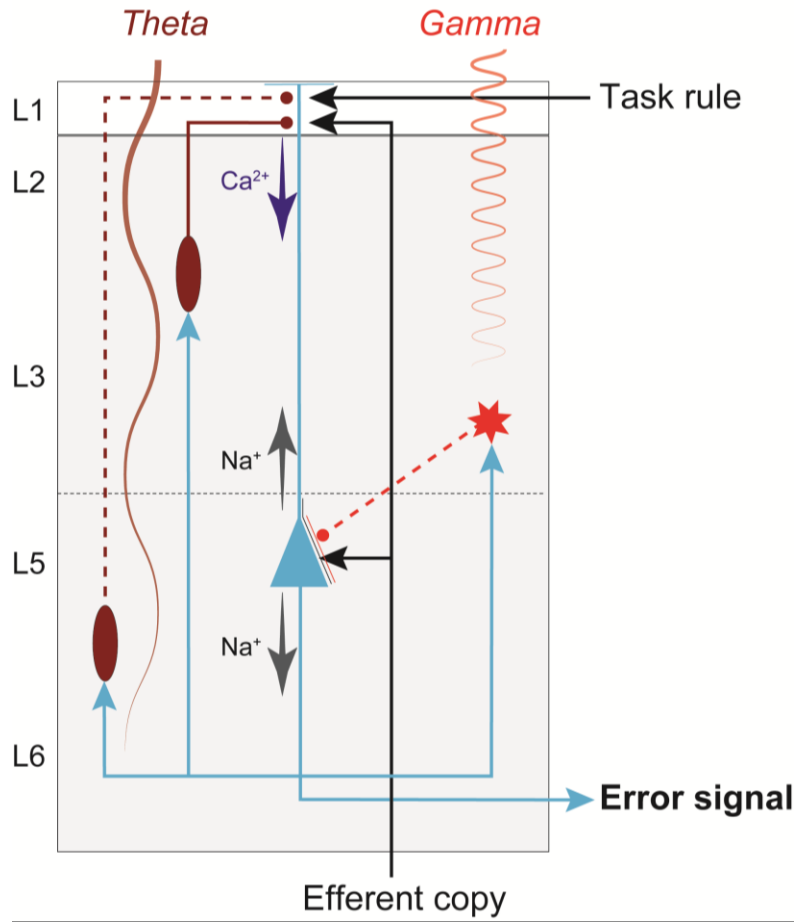

816

817 **Figure 6**
